# Supplementary material
Source: PubMed Central journal article supplement (PMC8772345)
Supplement: NIHMS1770924-supplement-appendix.pdf [file NIHMS1770924-supplement-appendix.pdf]

**CT Angiogram Hodgkin Atlas:**

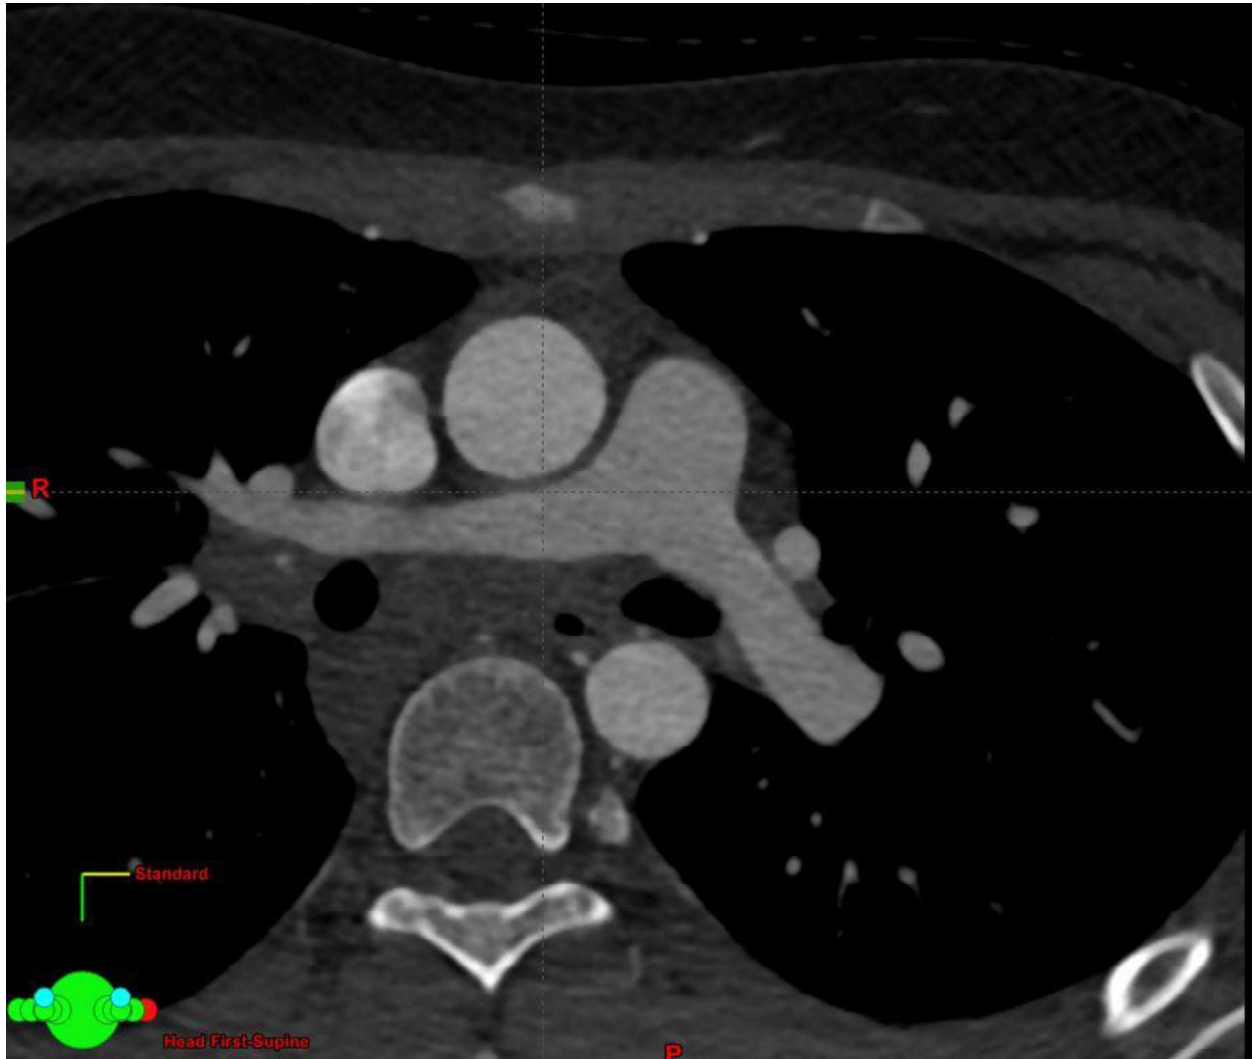

Yellow: Left main coronary artery

Pink: Left anterior descending

Orange: Left Circumflex

White: Right Coronary Artery

Brown: Aortic Valve

Light green: Pulmonary Valve

Blue: Mitral Valve

Red: Tricuspid Valve

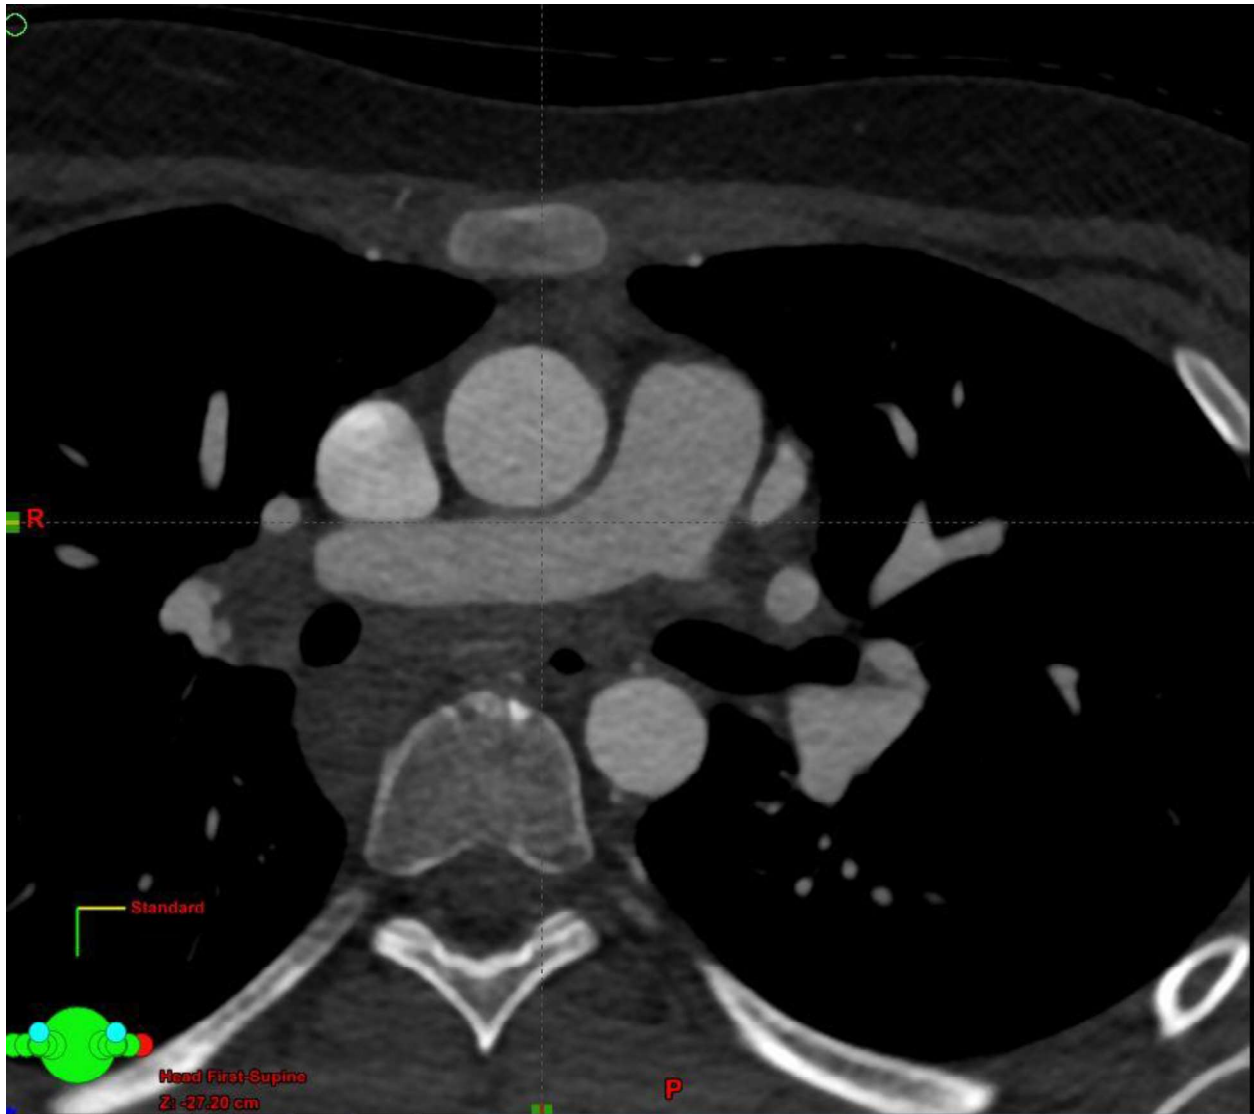

Yellow: Left main coronary artery

Pink: Left anterior descending

Orange: Left Circumflex

White: Right Coronary Artery

Brown: Aortic Valve

Light green: Pulmonary Valve

Blue: Mitral Valve

Red: Tricuspid Valve

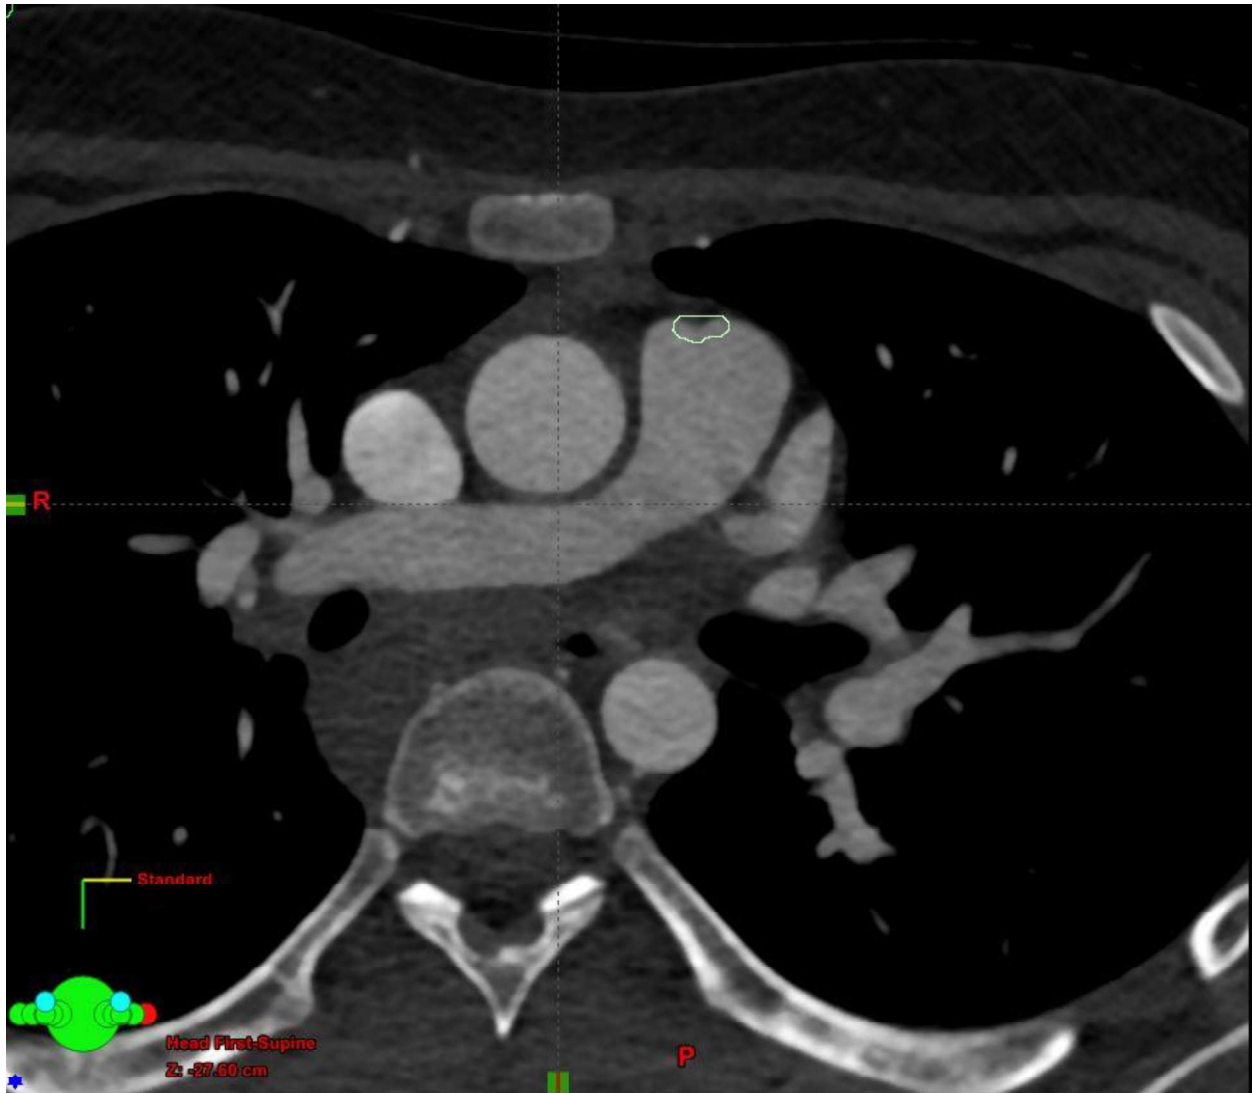

Yellow: Left main coronary artery

Pink: Left anterior descending

Orange: Left Circumflex

White: Right Coronary Artery

Brown: Aortic Valve

Light green: Pulmonary Valve

Blue: Mitral Valve

Red: Tricuspid Valve

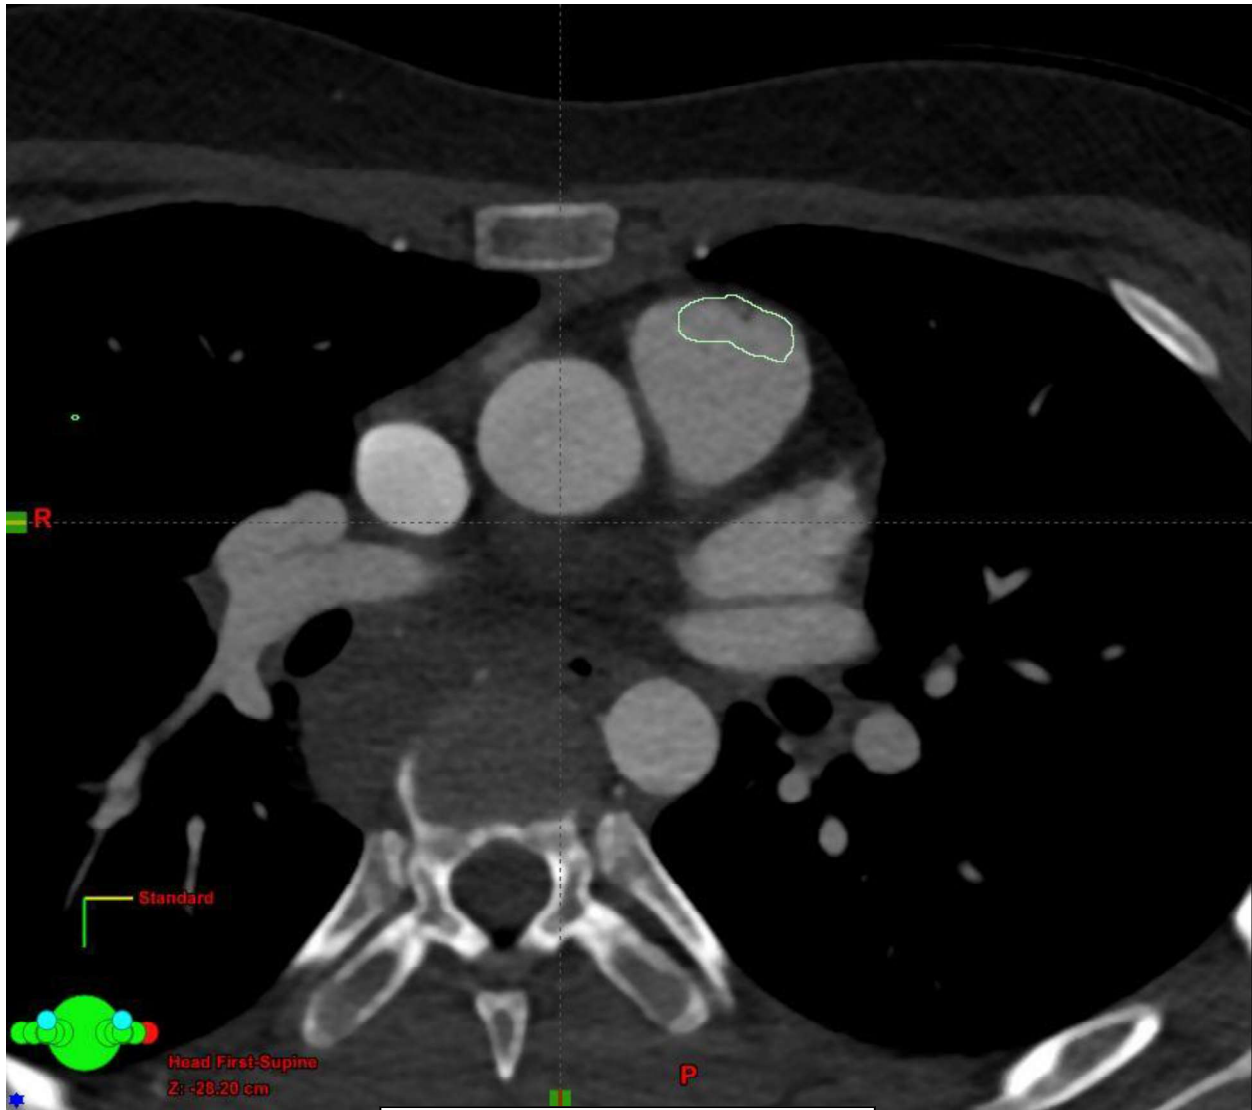

Yellow: Left main coronary artery

Pink: Left anterior descending

Orange: Left Circumflex

White: Right Coronary Artery

Brown: Aortic Valve

Light green: Pulmonary Valve

Blue: Mitral Valve

Red: Tricuspid Valve

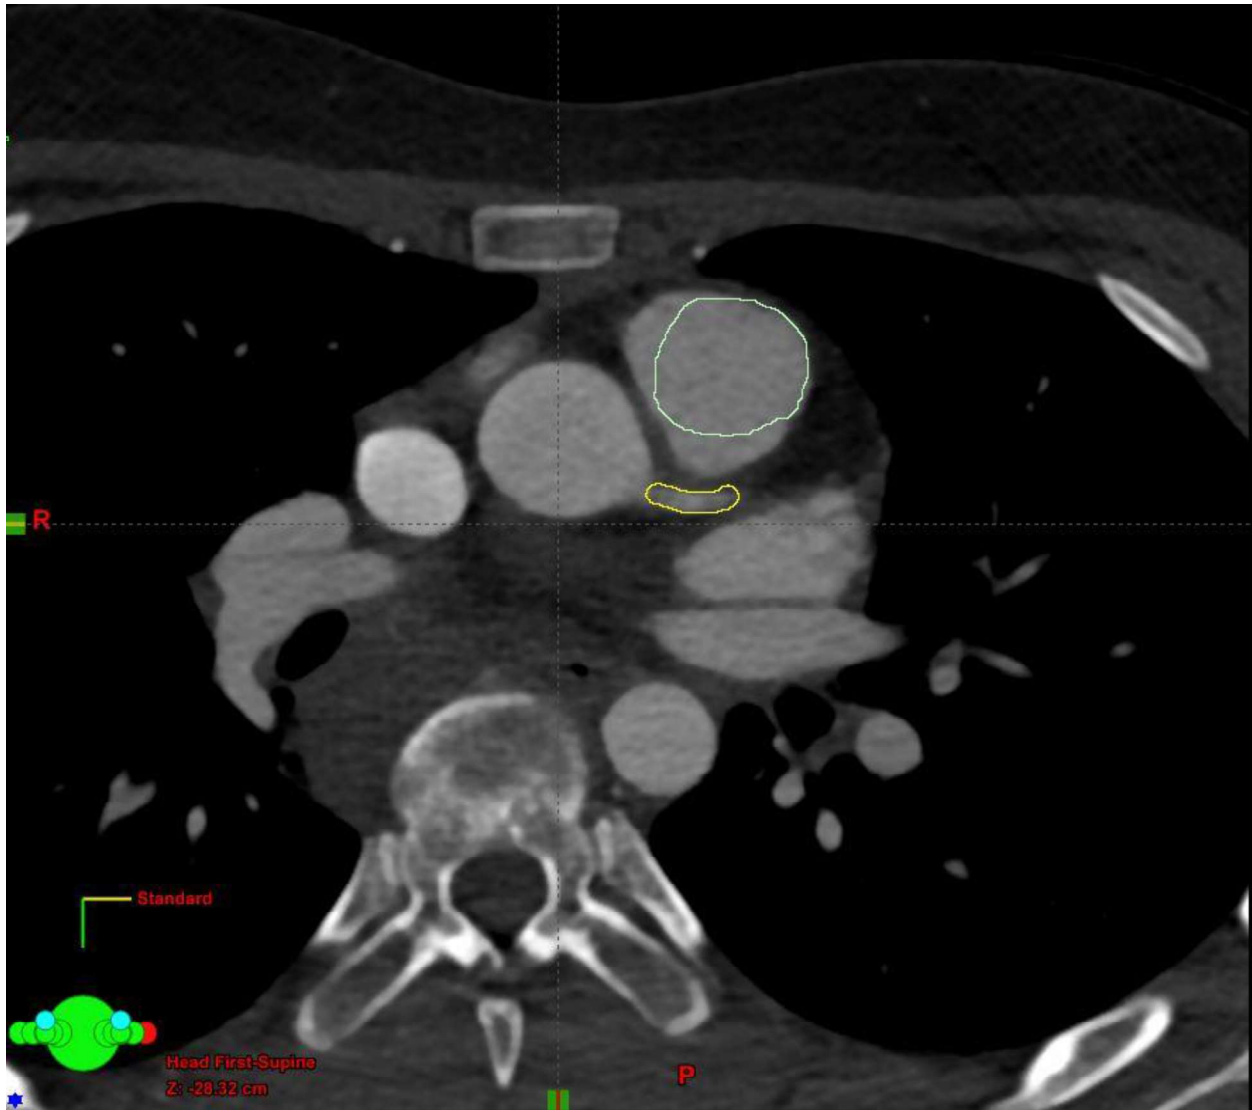

Yellow: Left main coronary artery

Pink: Left anterior descending

Orange: Left Circumflex

White: Right Coronary Artery

Brown: Aortic Valve

Light green: Pulmonary Valve

Blue: Mitral Valve

Red: Tricuspid Valve

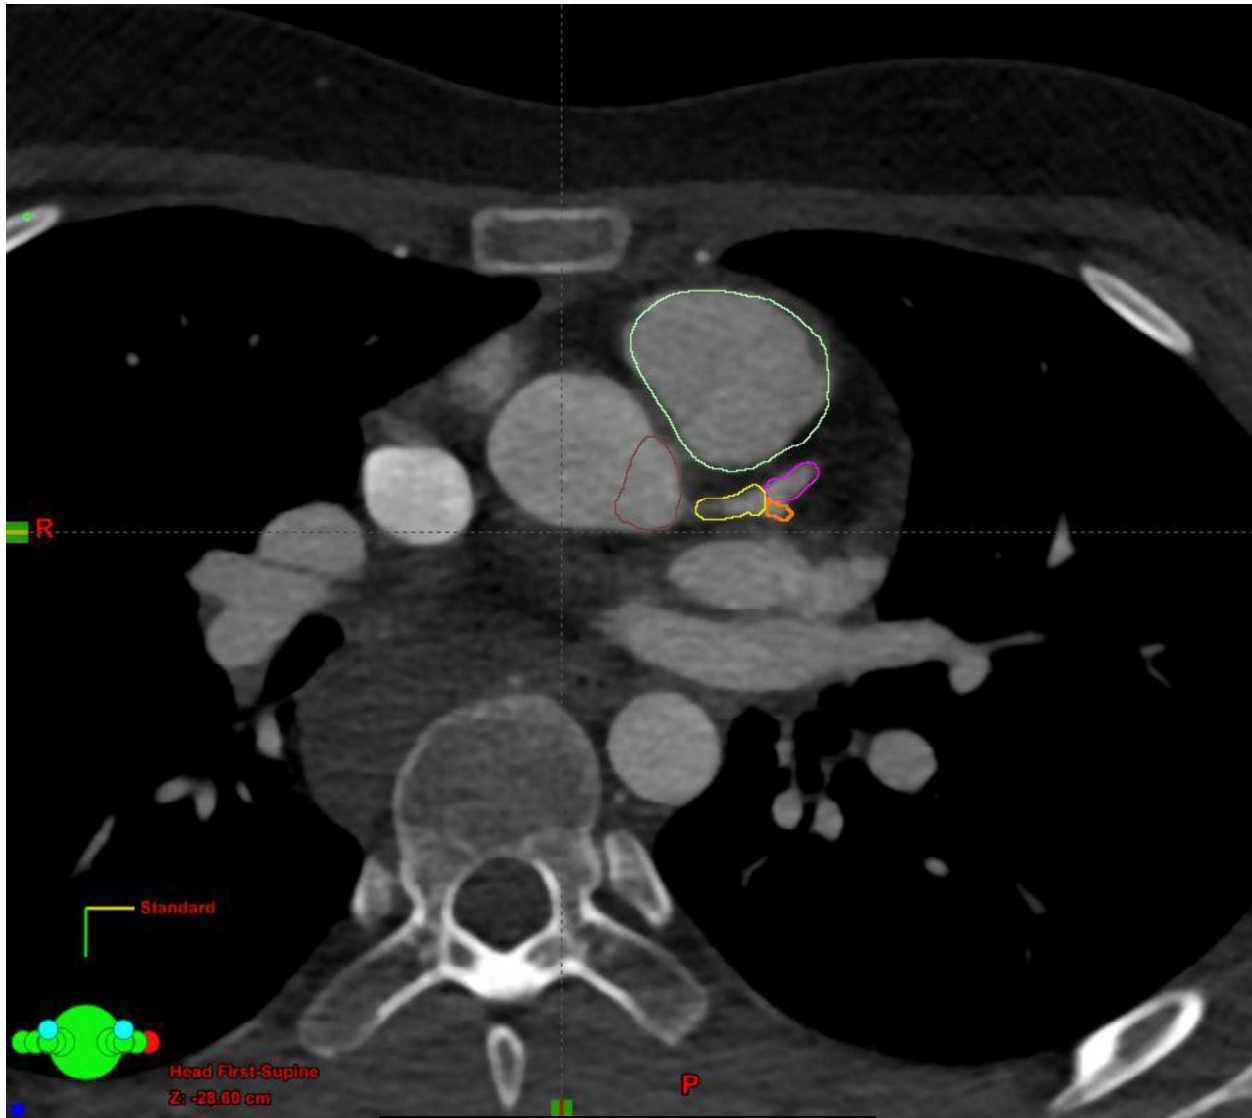

Yellow: Left main coronary artery

Pink: Left anterior descending

Orange: Left Circumflex

White: Right Coronary Artery

Brown: Aortic Valve

Light green: Pulmonary Valve

Blue: Mitral Valve

Red: Tricuspid Valve

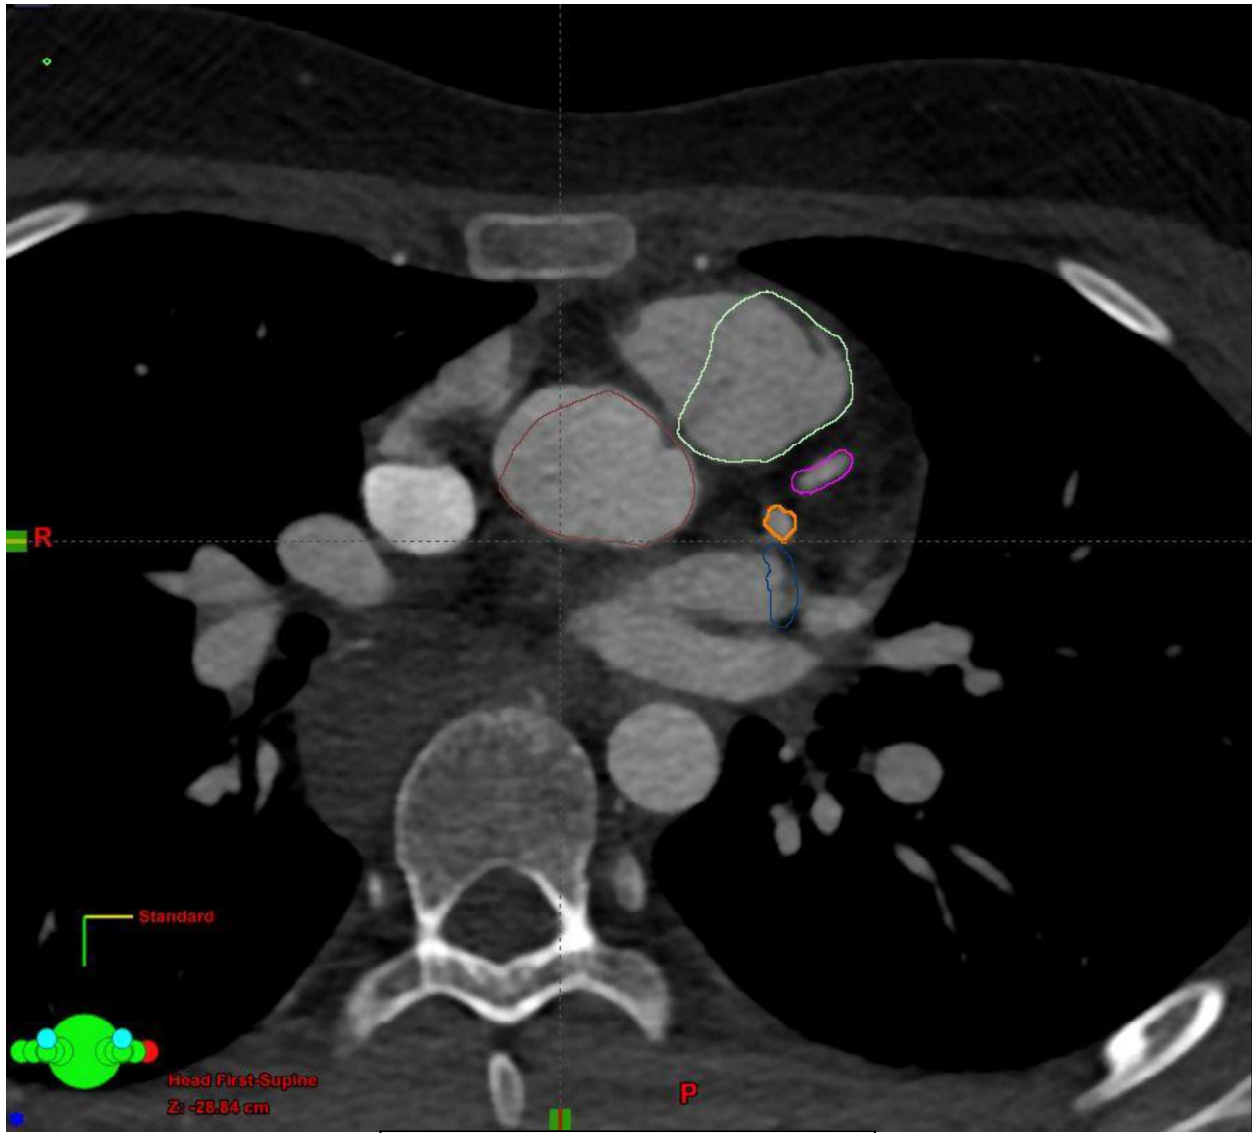

Yellow: Left main coronary artery

Pink: Left anterior descending

Orange: Left Circumflex

White: Right Coronary Artery

Brown: Aortic Valve

Light green: Pulmonary Valve

Blue: Mitral Valve

Red: Tricuspid Valve



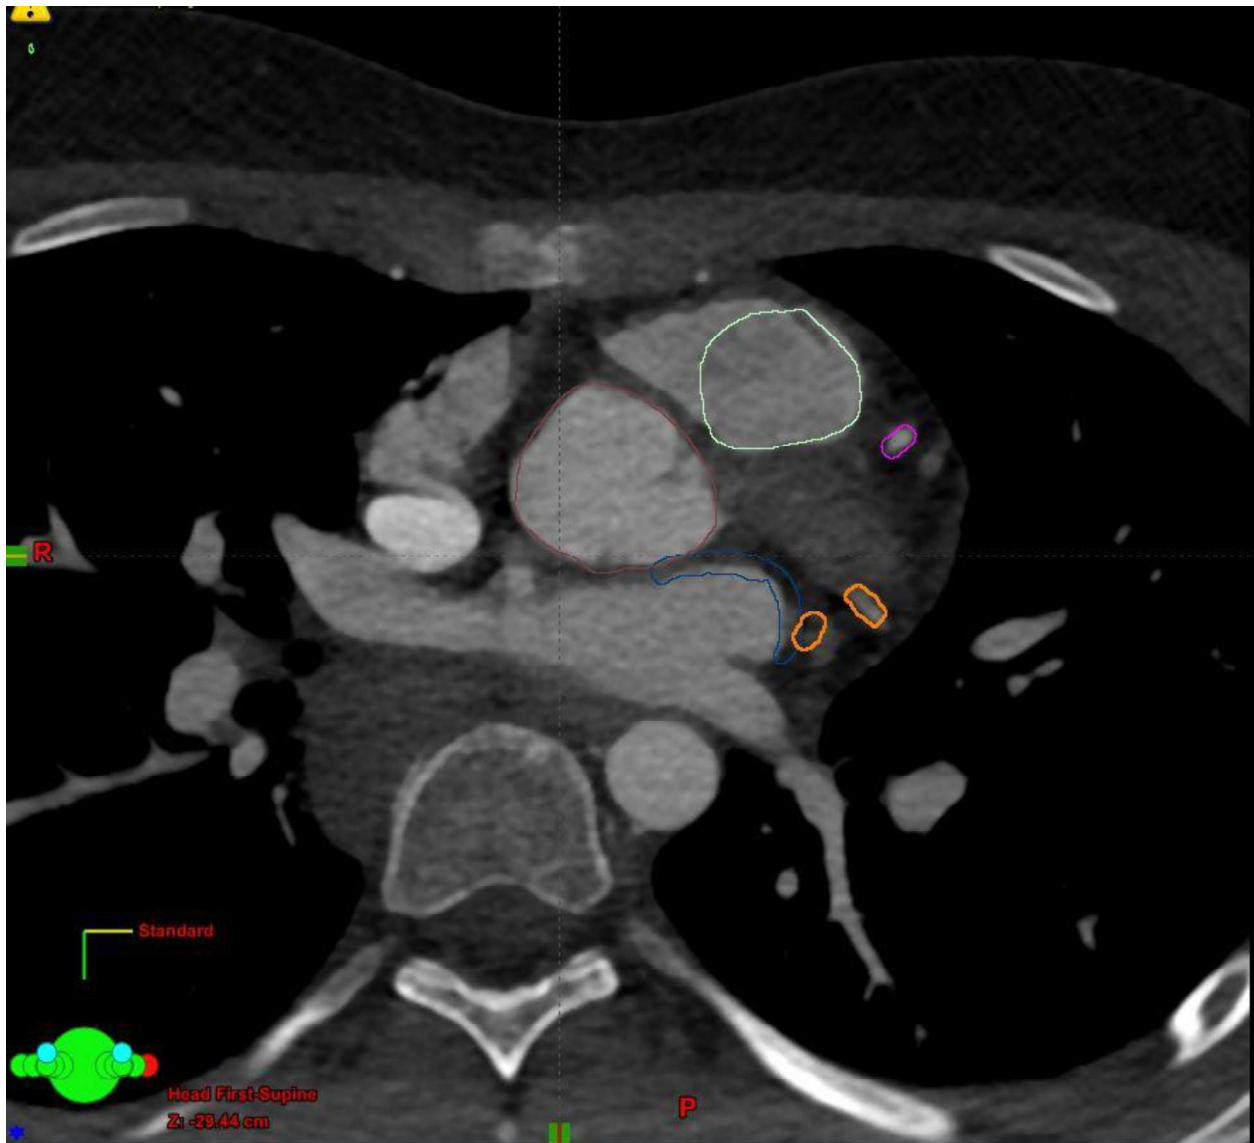

Yellow: Left main coronary artery

Pink: Left anterior descending

Orange: Left Circumflex

White: Right Coronary Artery

Brown: Aortic Valve

Light green: Pulmonary Valve

Blue: Mitral Valve

Red: Tricuspid Valve



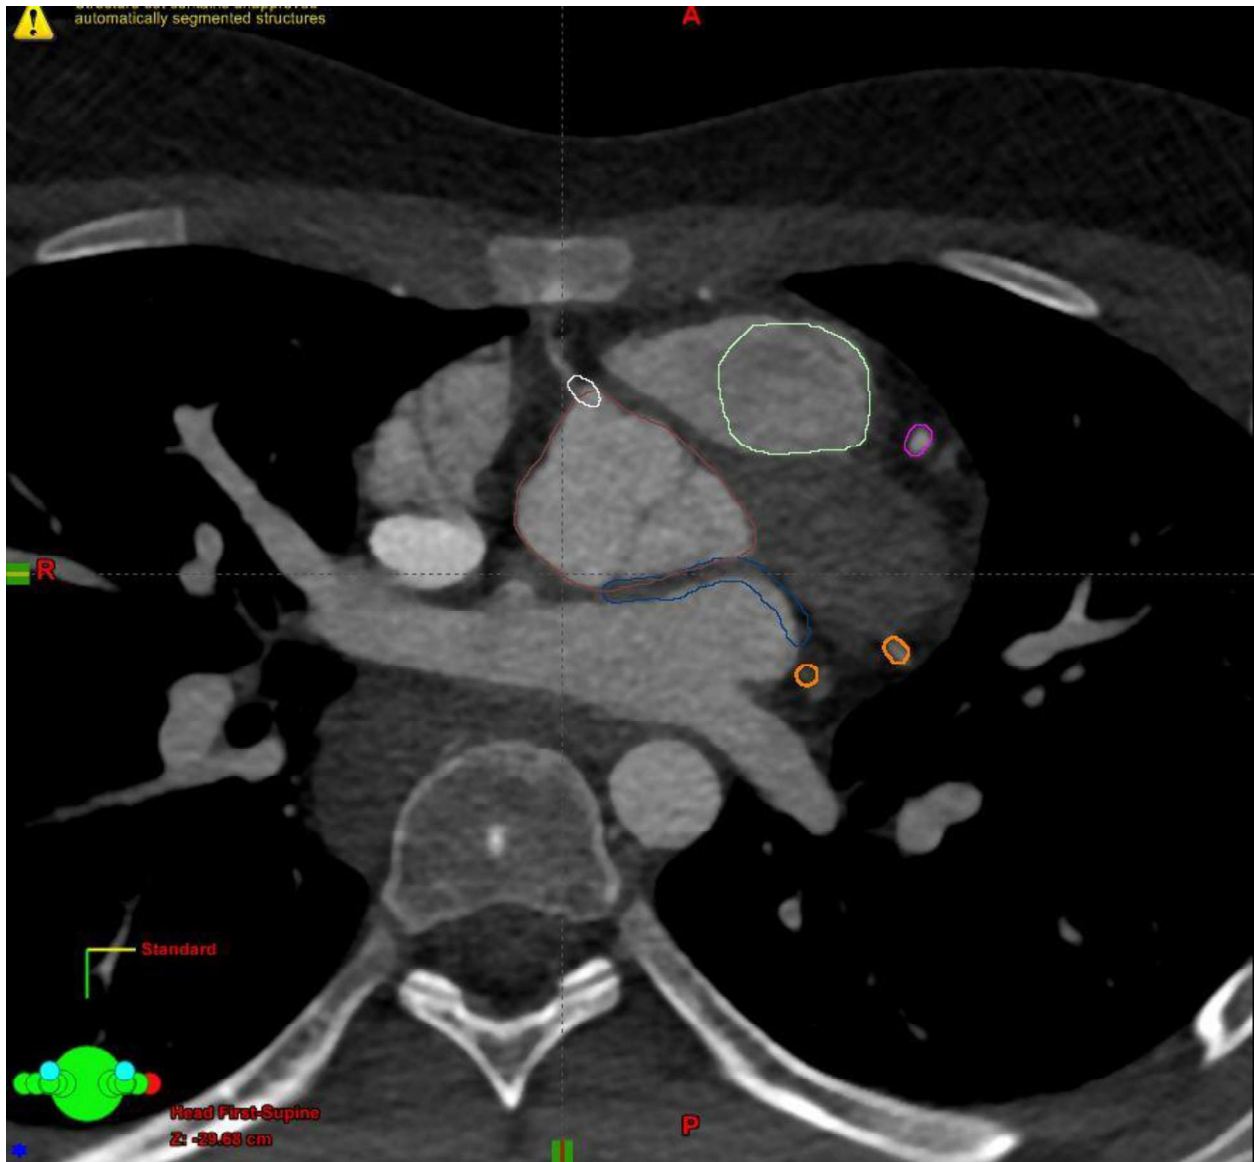

Yellow: Left main coronary artery

Pink: Left anterior descending

Orange: Left Circumflex

White: Right Coronary Artery

Brown: Aortic Valve

Light green: Pulmonary Valve

Blue: Mitral Valve

Red: Tricuspid Valve

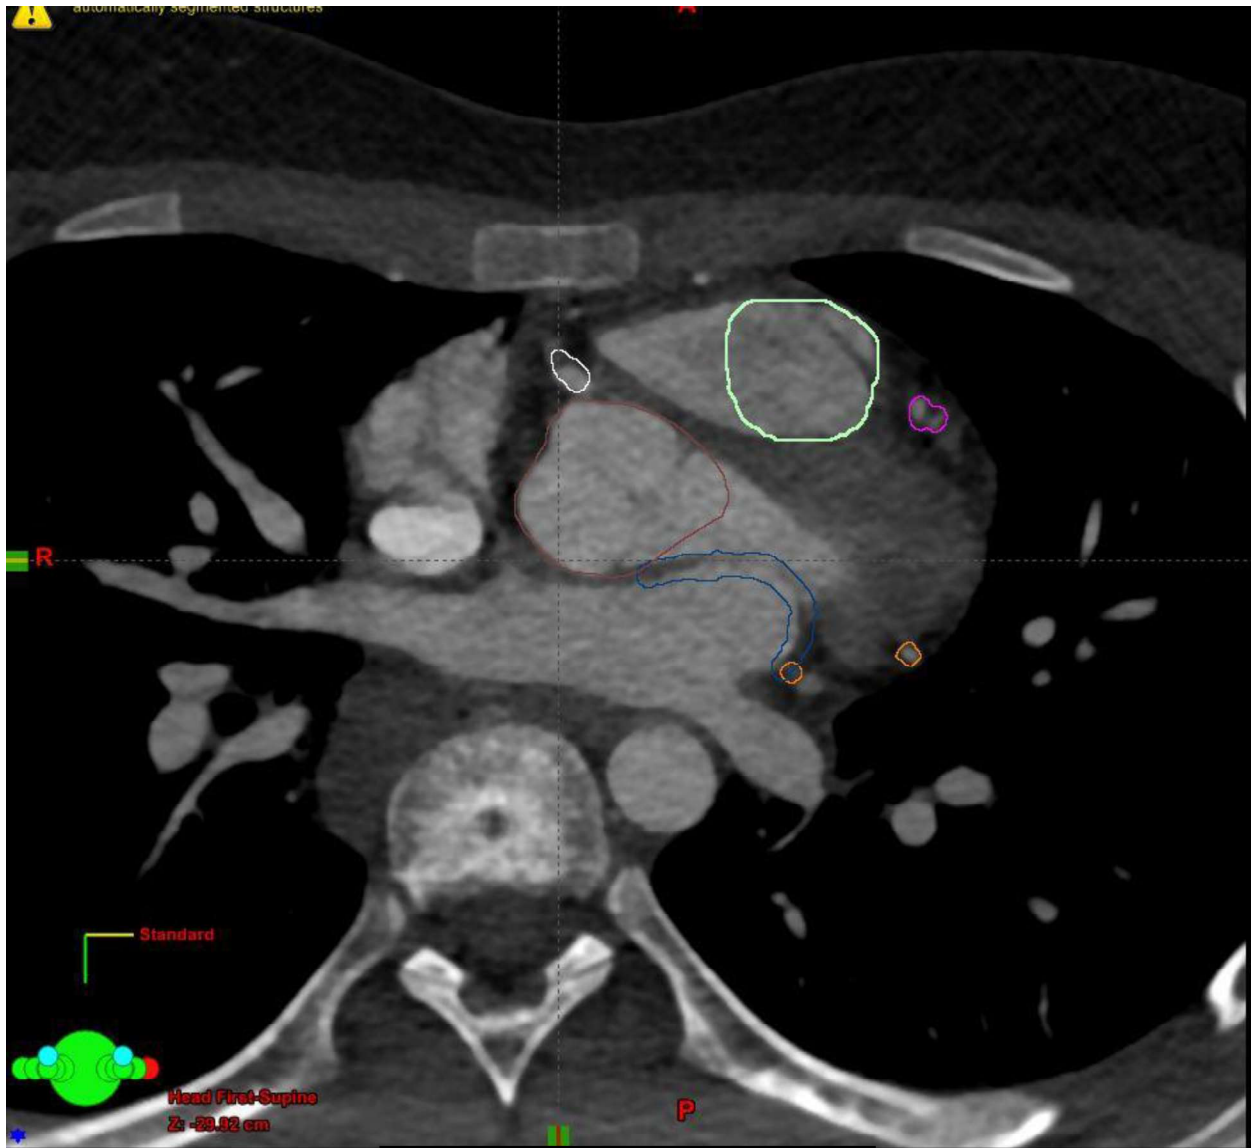

Yellow: Left main coronary artery

Pink: Left anterior descending

Orange: Left Circumflex

White: Right Coronary Artery

Brown: Aortic Valve

Light green: Pulmonary Valve

Blue: Mitral Valve

Red: Tricuspid Valve

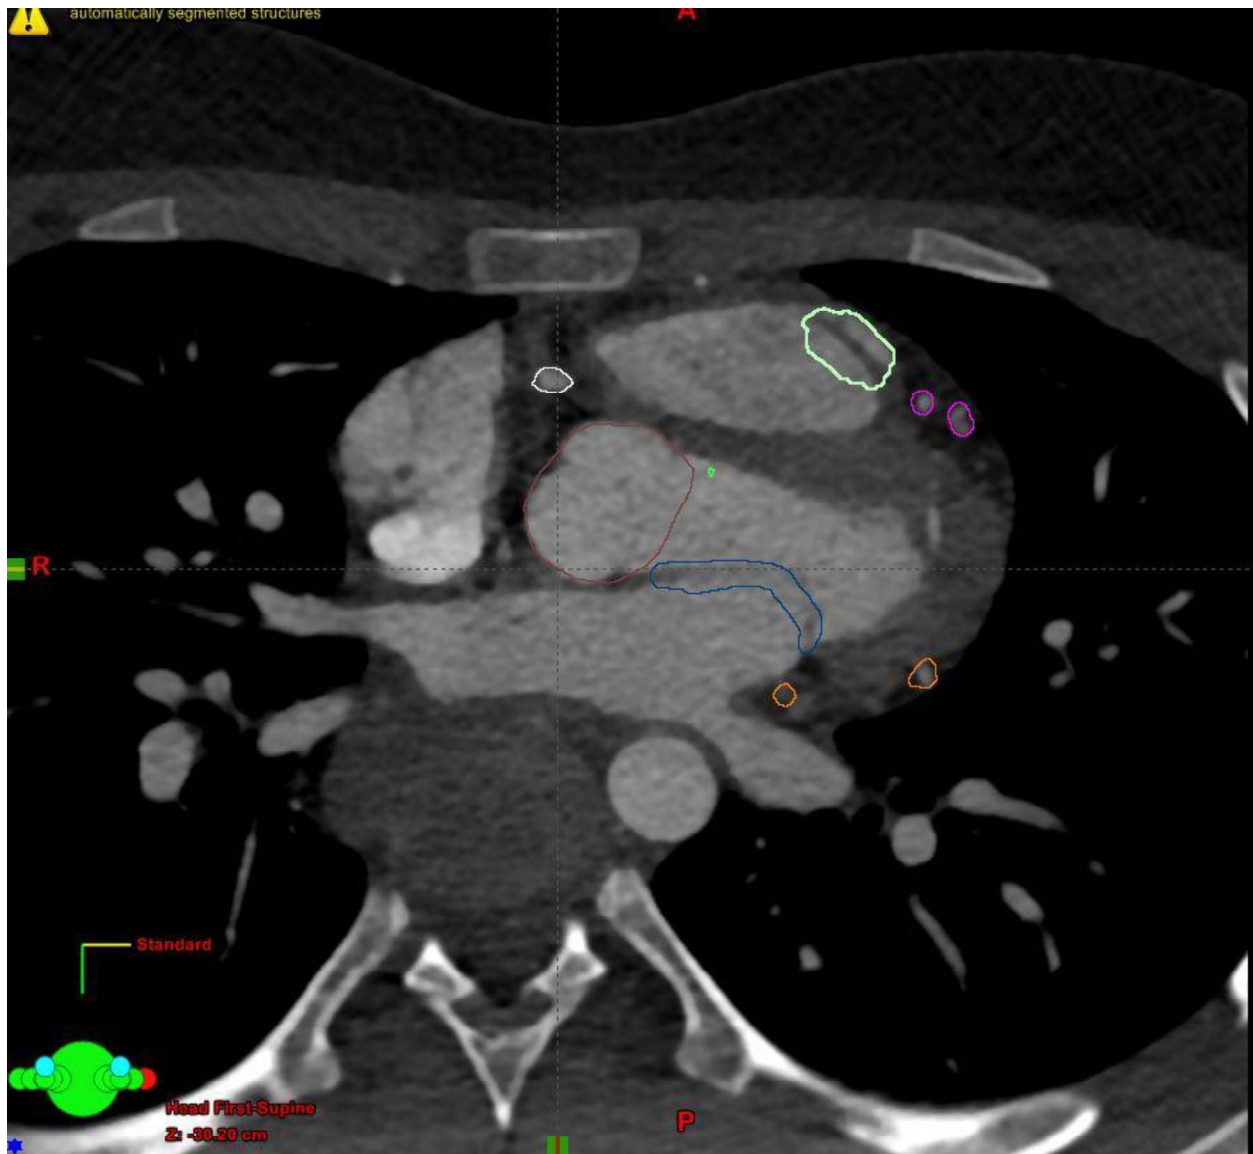

Yellow: Left main coronary artery

Pink: Left anterior descending

Orange: Left Circumflex

White: Right Coronary Artery

Brown: Aortic Valve

Light green: Pulmonary Valve

Blue: Mitral Valve

Red: Tricuspid Valve

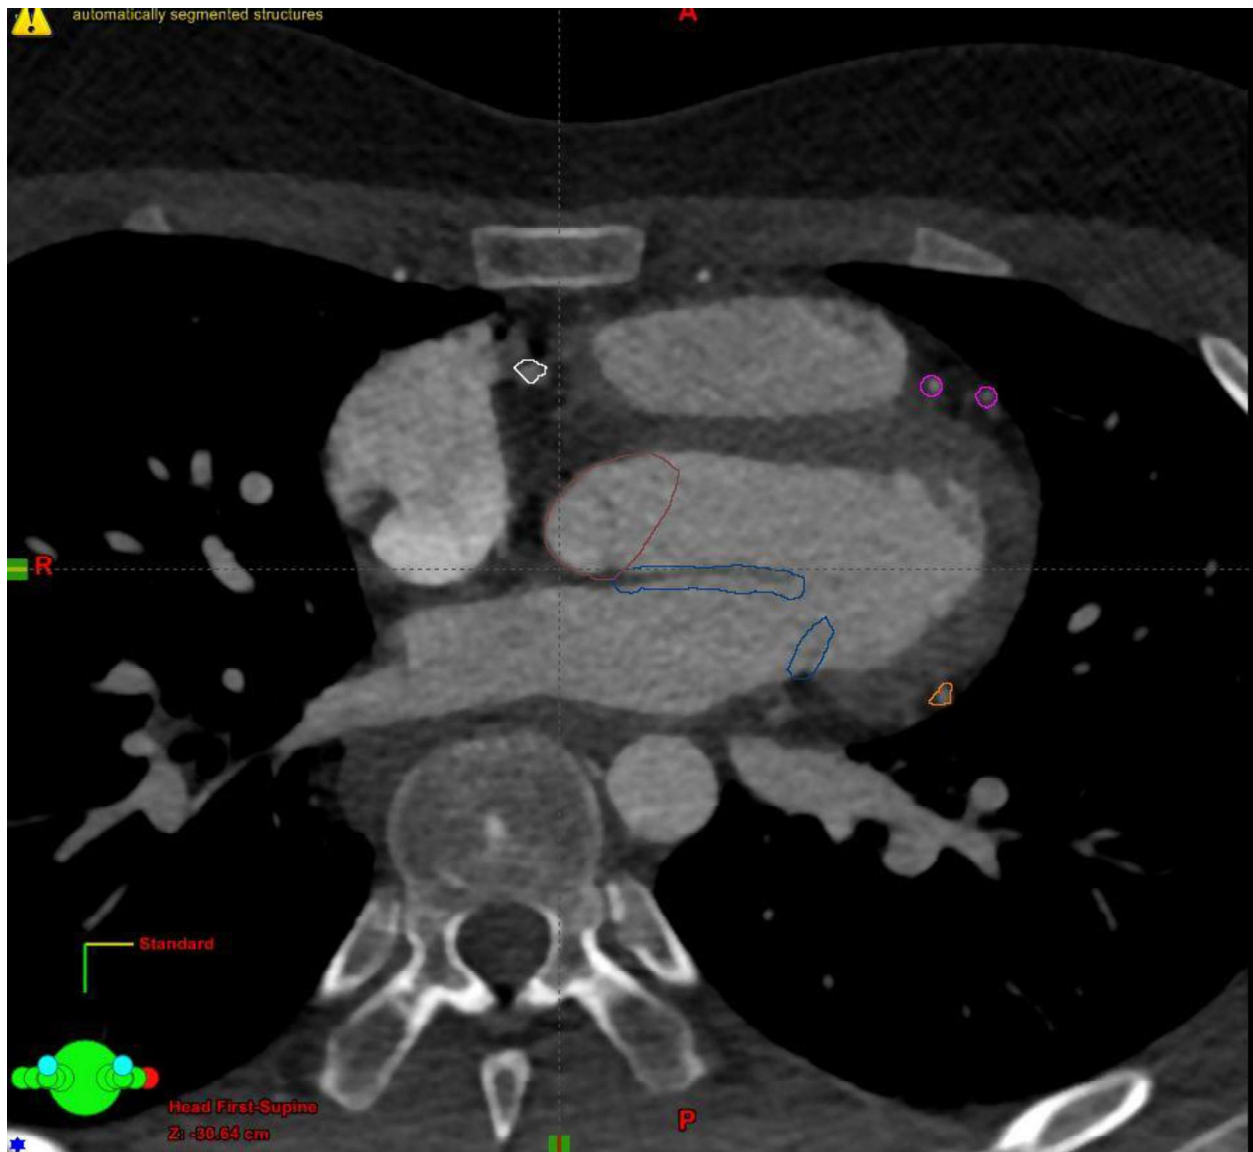

Yellow: Left main coronary artery

Pink: Left anterior descending

Orange: Left Circumflex

White: Right Coronary Artery

Brown: Aortic Valve

Light green: Pulmonary Valve

Blue: Mitral Valve

Red: Tricuspid Valve

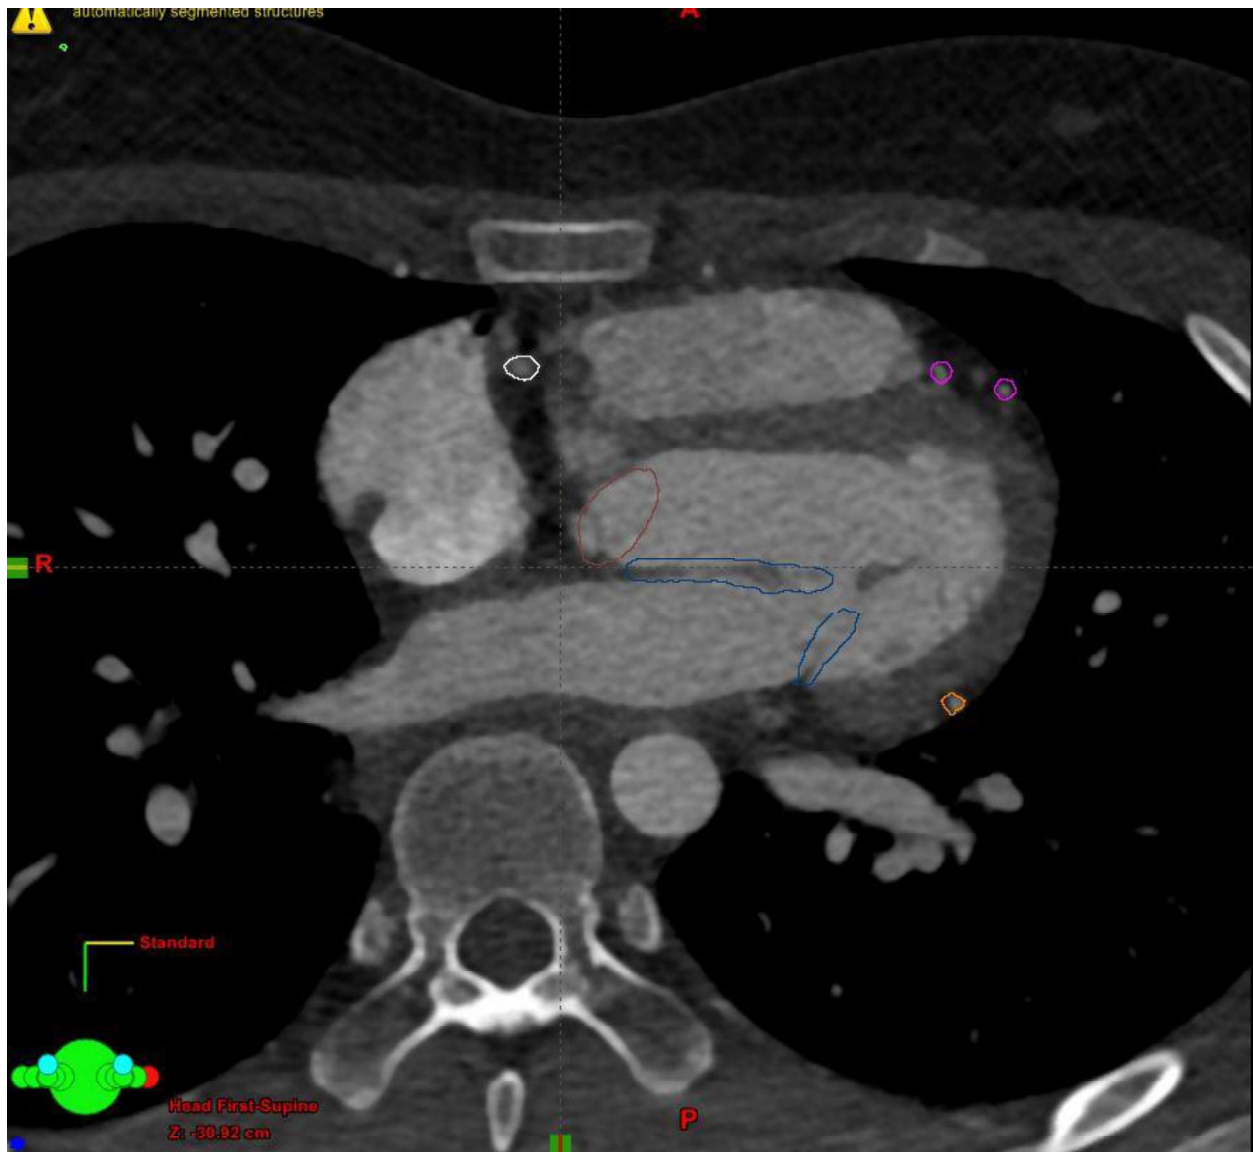

Yellow: Left main coronary artery

Pink: Left anterior descending

Orange: Left Circumflex

White: Right Coronary Artery

Brown: Aortic Valve

Light green: Pulmonary Valve

Blue: Mitral Valve

Red: Tricuspid Valve



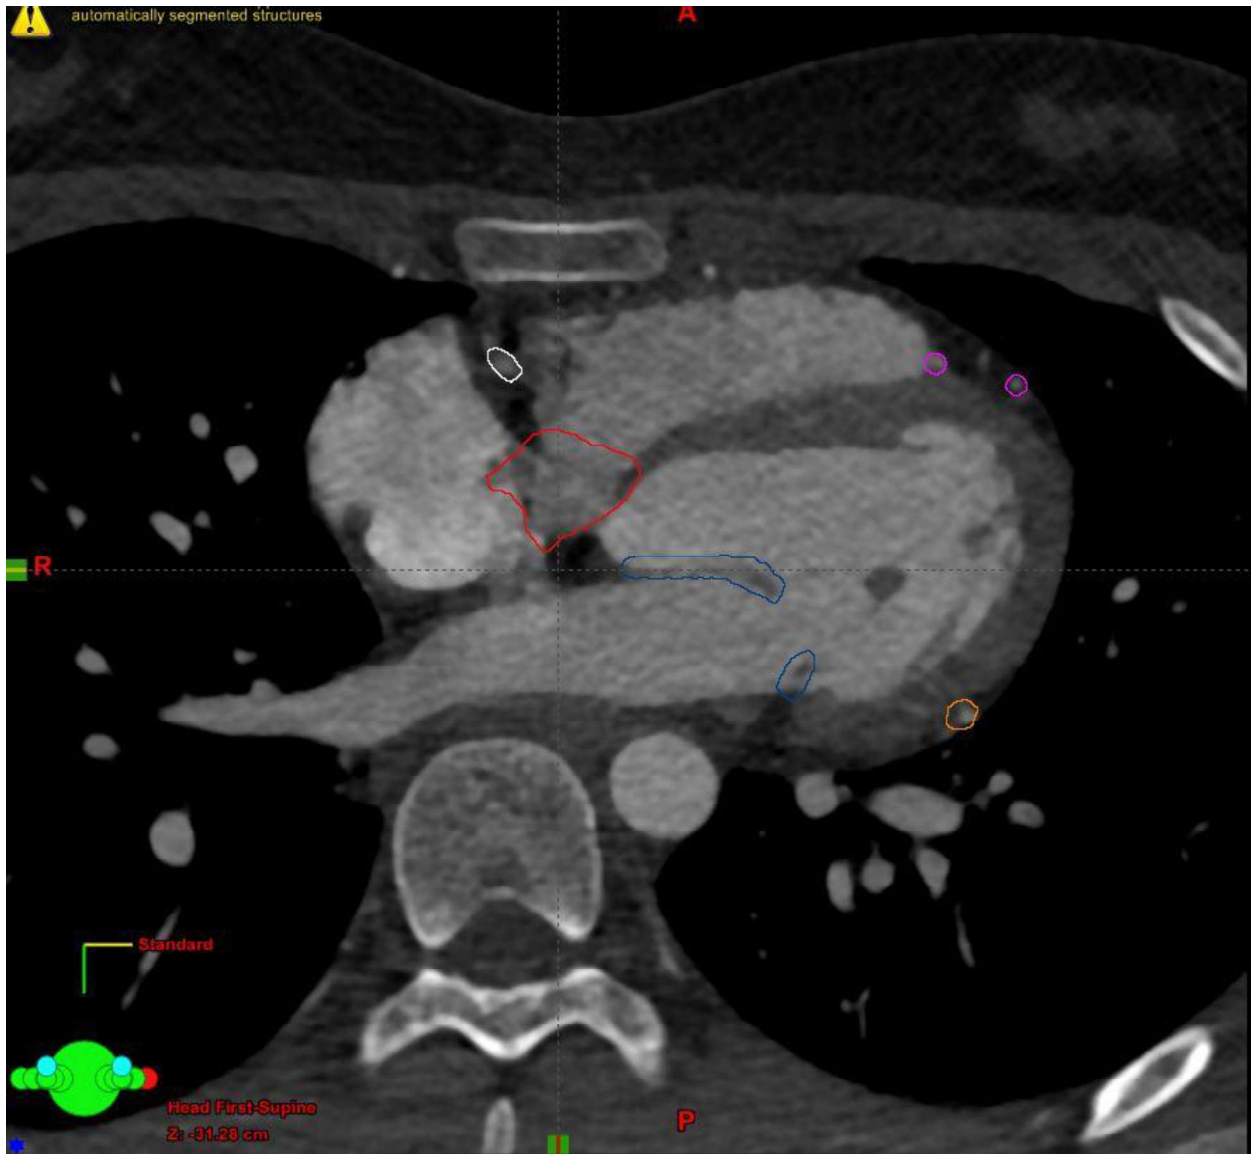

Yellow: Left main coronary artery

Pink: Left anterior descending

Orange: Left Circumflex

White: Right Coronary Artery

Brown: Aortic Valve

Light green: Pulmonary Valve

Blue: Mitral Valve

Red: Tricuspid Valve

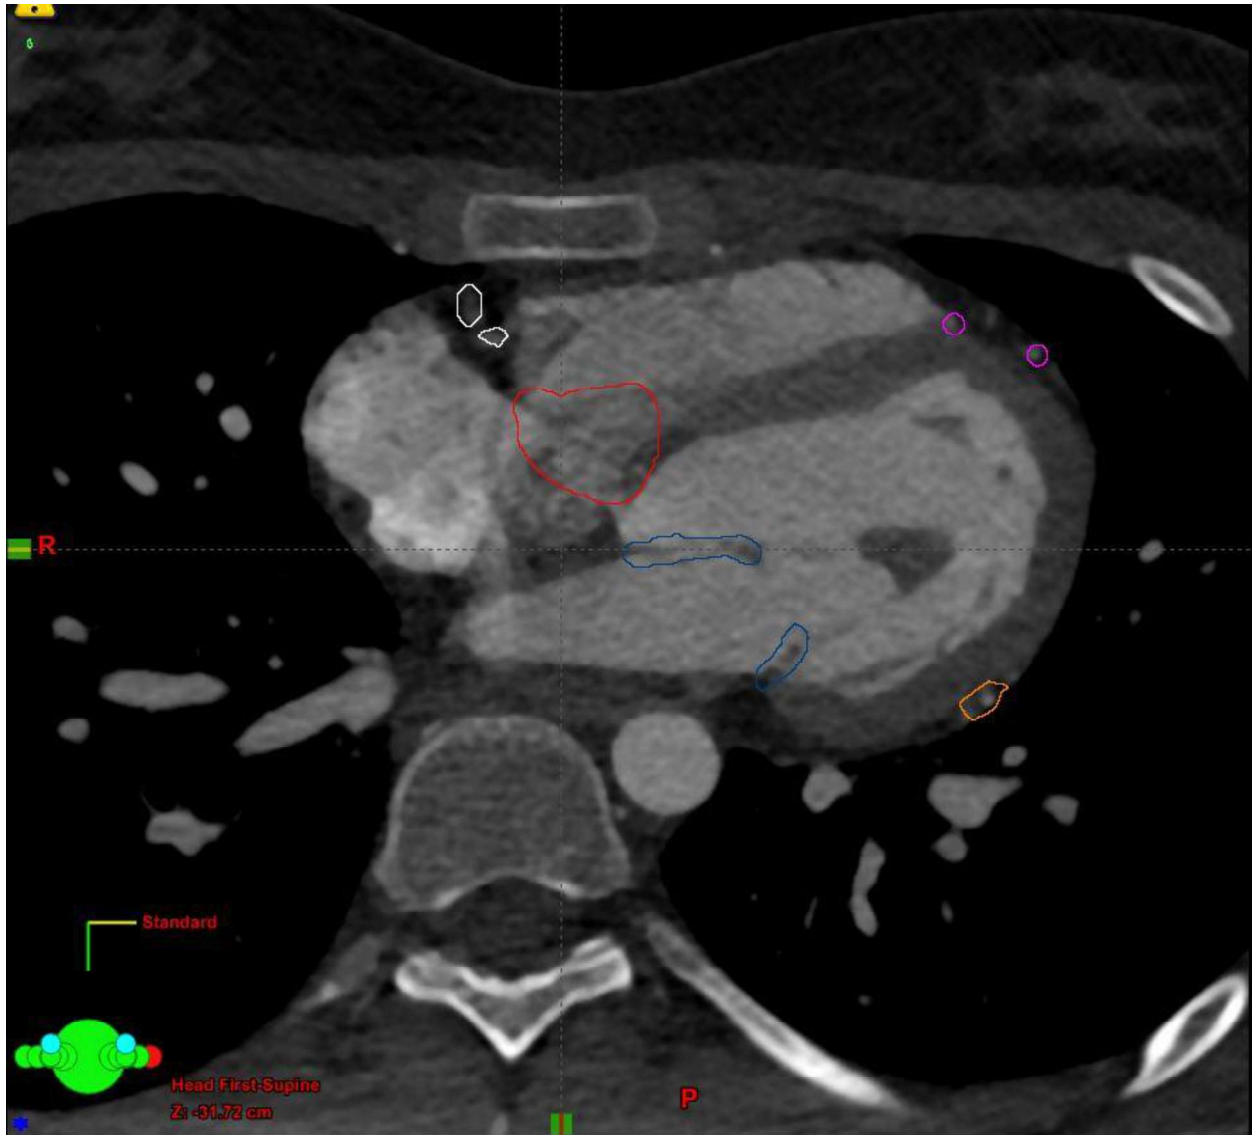

Yellow: Left main coronary artery

Pink: Left anterior descending

Orange: Left Circumflex

White: Right Coronary Artery

Brown: Aortic Valve

Light green: Pulmonary Valve

Blue: Mitral Valve

Red: Tricuspid Valve



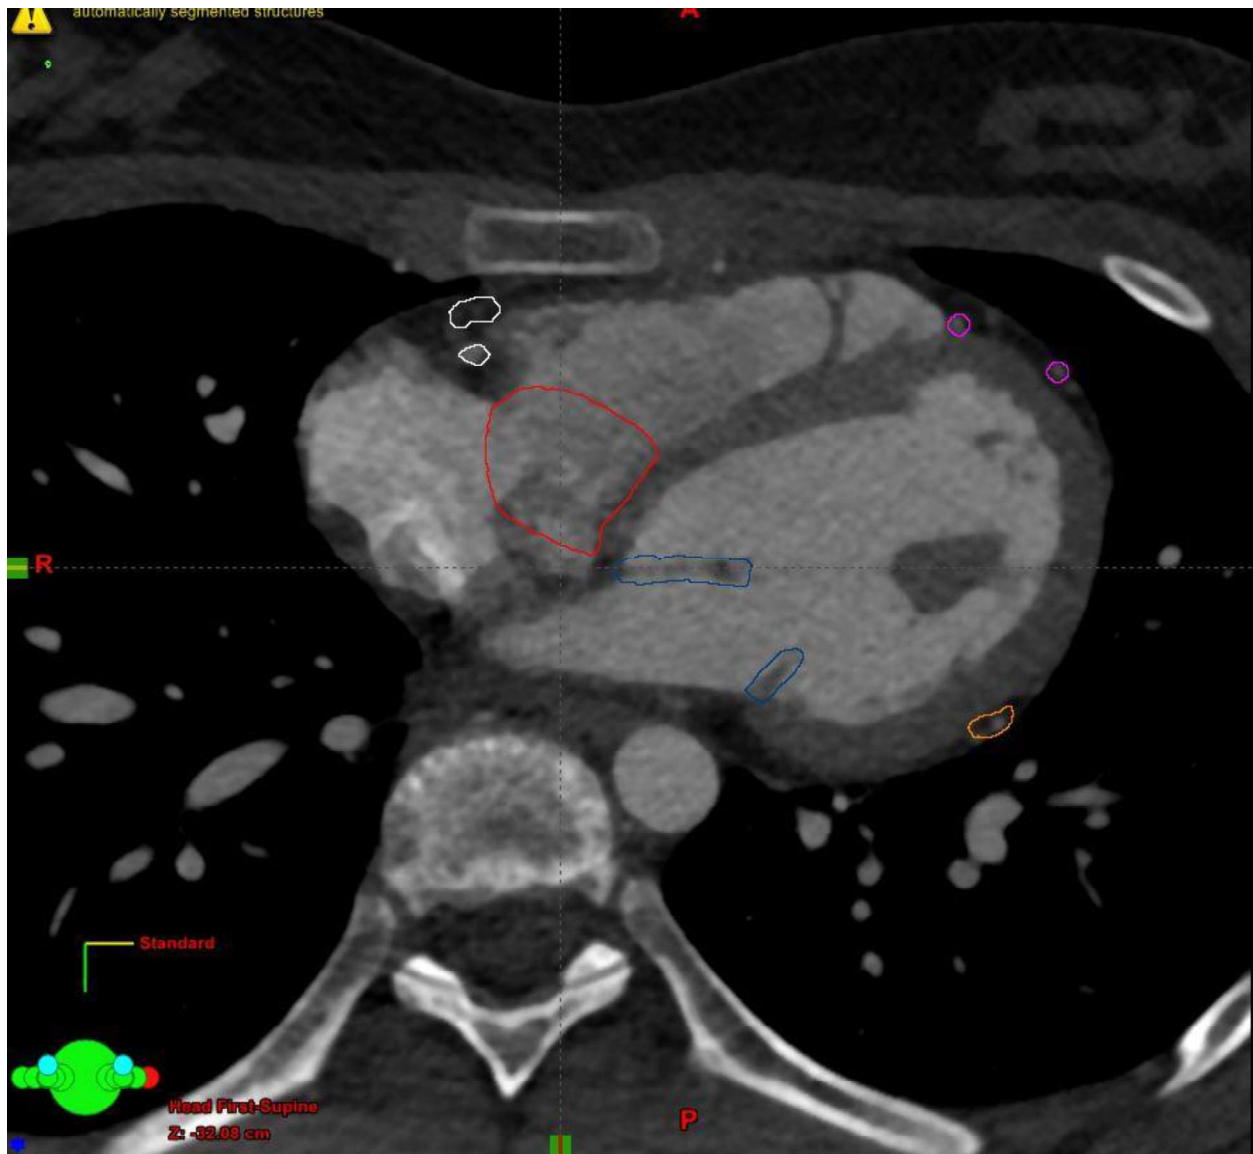

Yellow: Left main coronary artery

Pink: Left anterior descending

Orange: Left Circumflex

White: Right Coronary Artery

Brown: Aortic Valve

Light green: Pulmonary Valve

Blue: Mitral Valve

Red: Tricuspid Valve

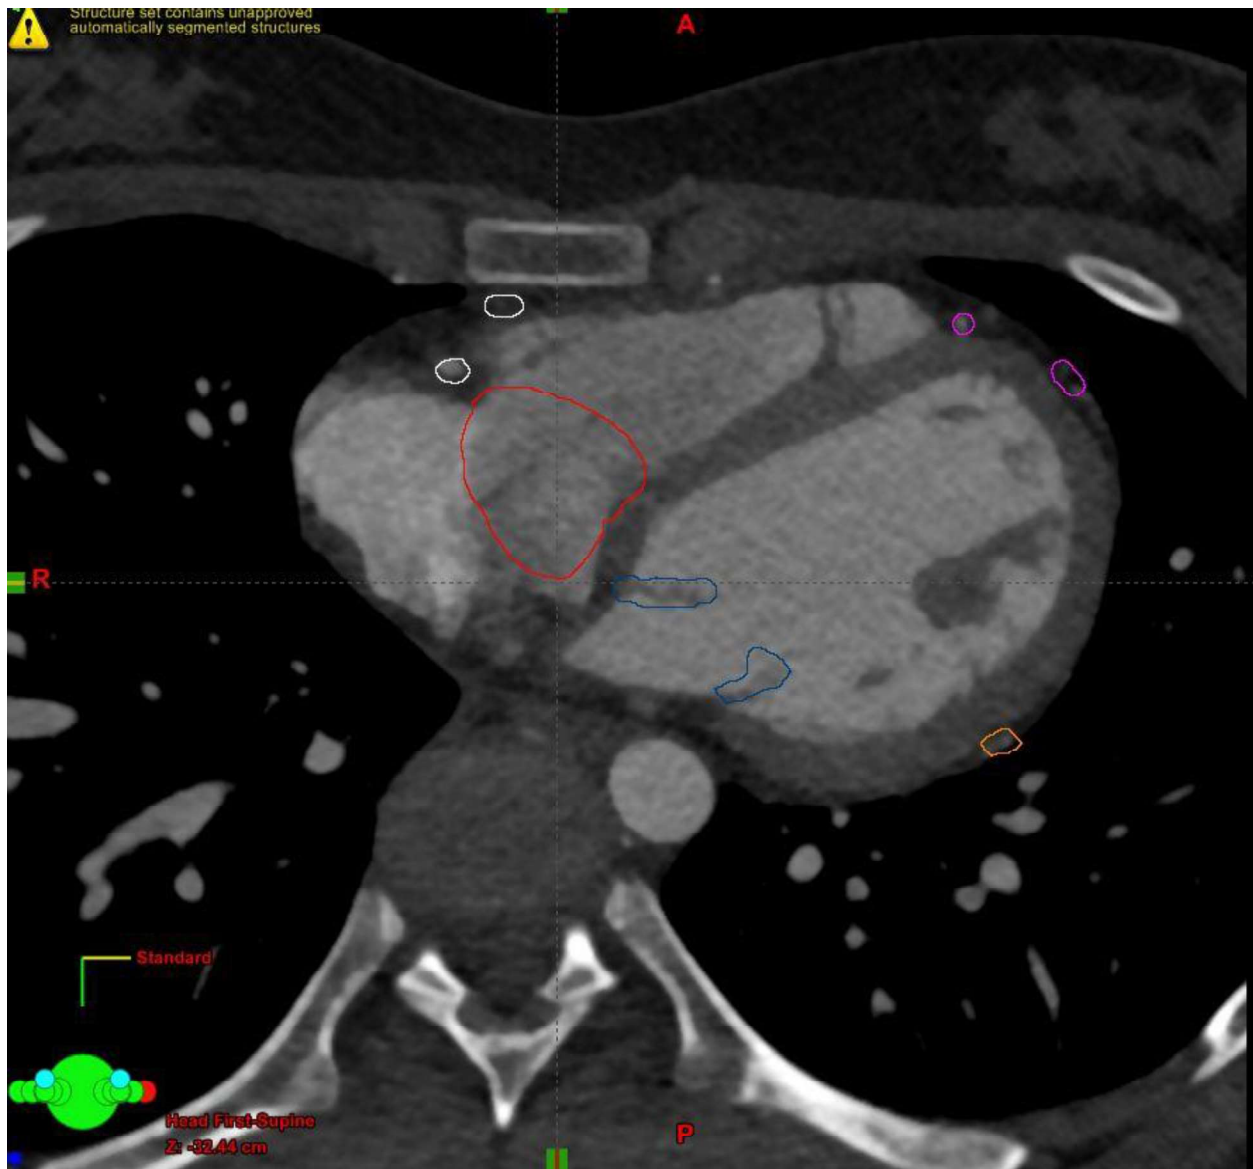

Yellow: Left main coronary artery

Pink: Left anterior descending

Orange: Left Circumflex

White: Right Coronary Artery

Brown: Aortic Valve

Light green: Pulmonary Valve

Blue: Mitral Valve

Red: Tricuspid Valve

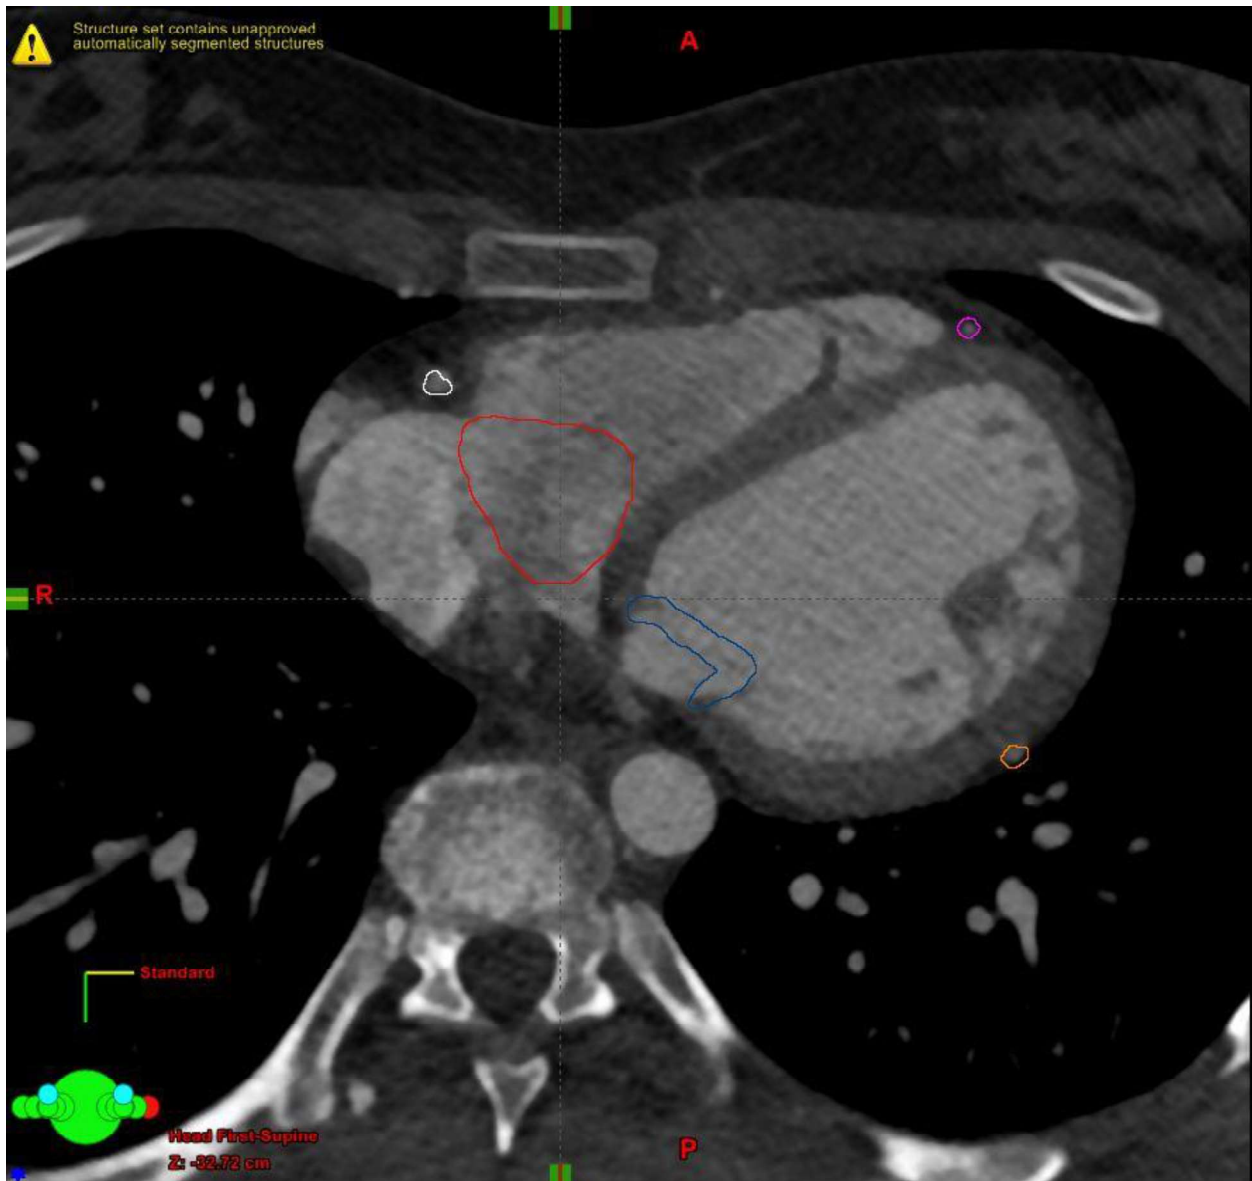

Yellow: Left main coronary artery

Pink: Left anterior descending

Orange: Left Circumflex

White: Right Coronary Artery

Brown: Aortic Valve

Light green: Pulmonary Valve

Blue: Mitral Valve

Red: Tricuspid Valve

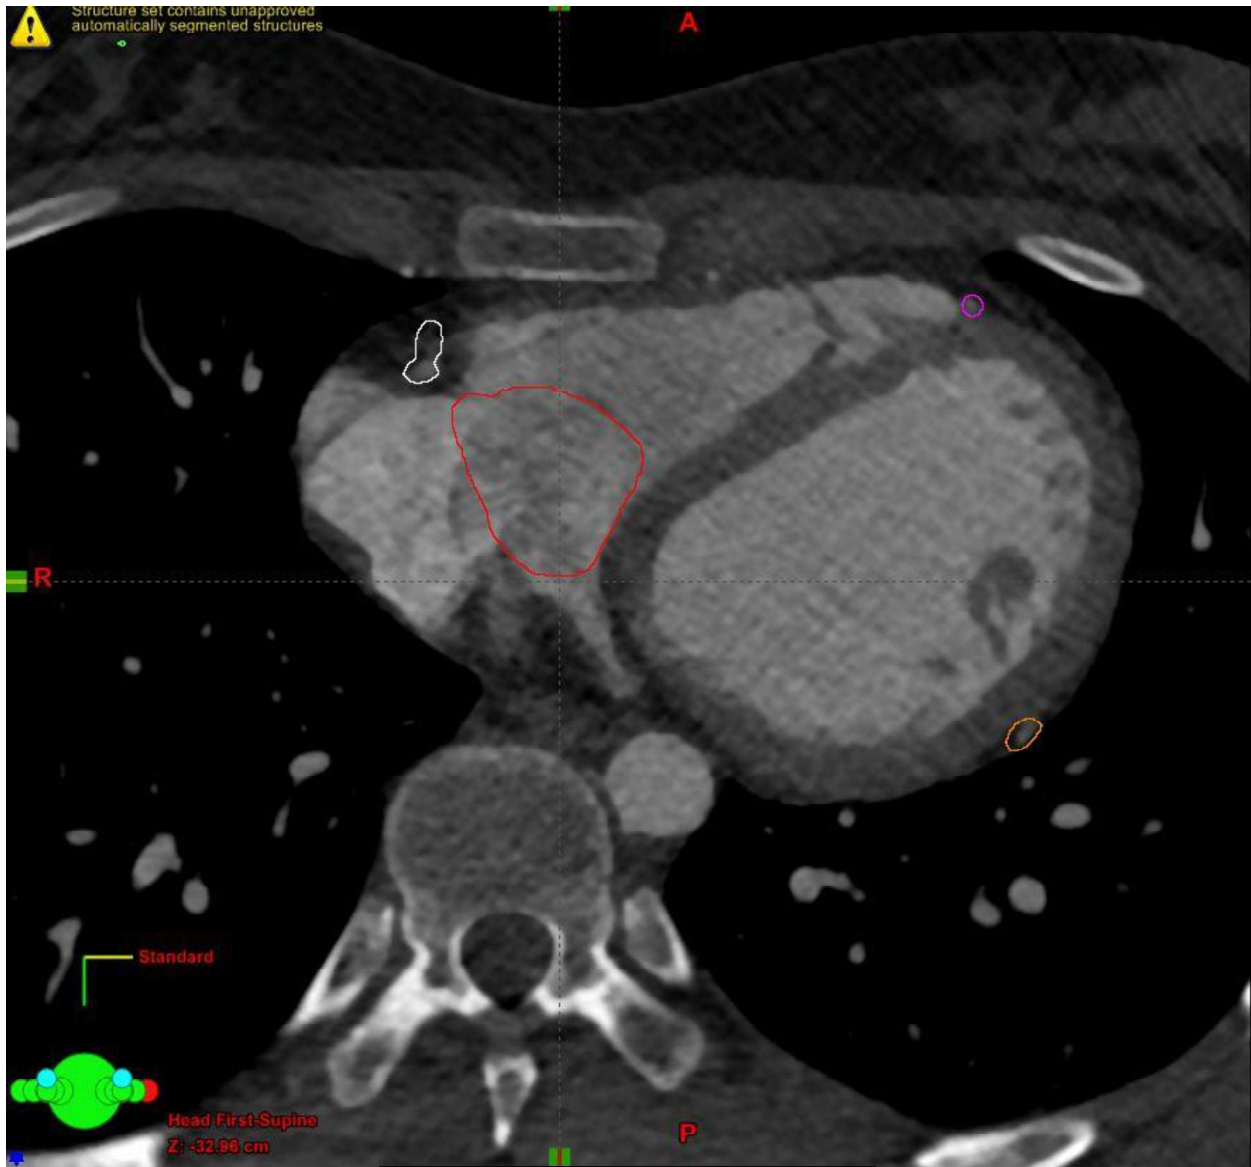

- Yellow: Left main coronary artery
- Pink: Left anterior descending
- Orange: Left Circumflex
- White: Right Coronary Artery
- Brown: Aortic Valve
- Light green: Pulmonary Valve
- Blue: Mitral Valve
- Red: Tricuspid Valve

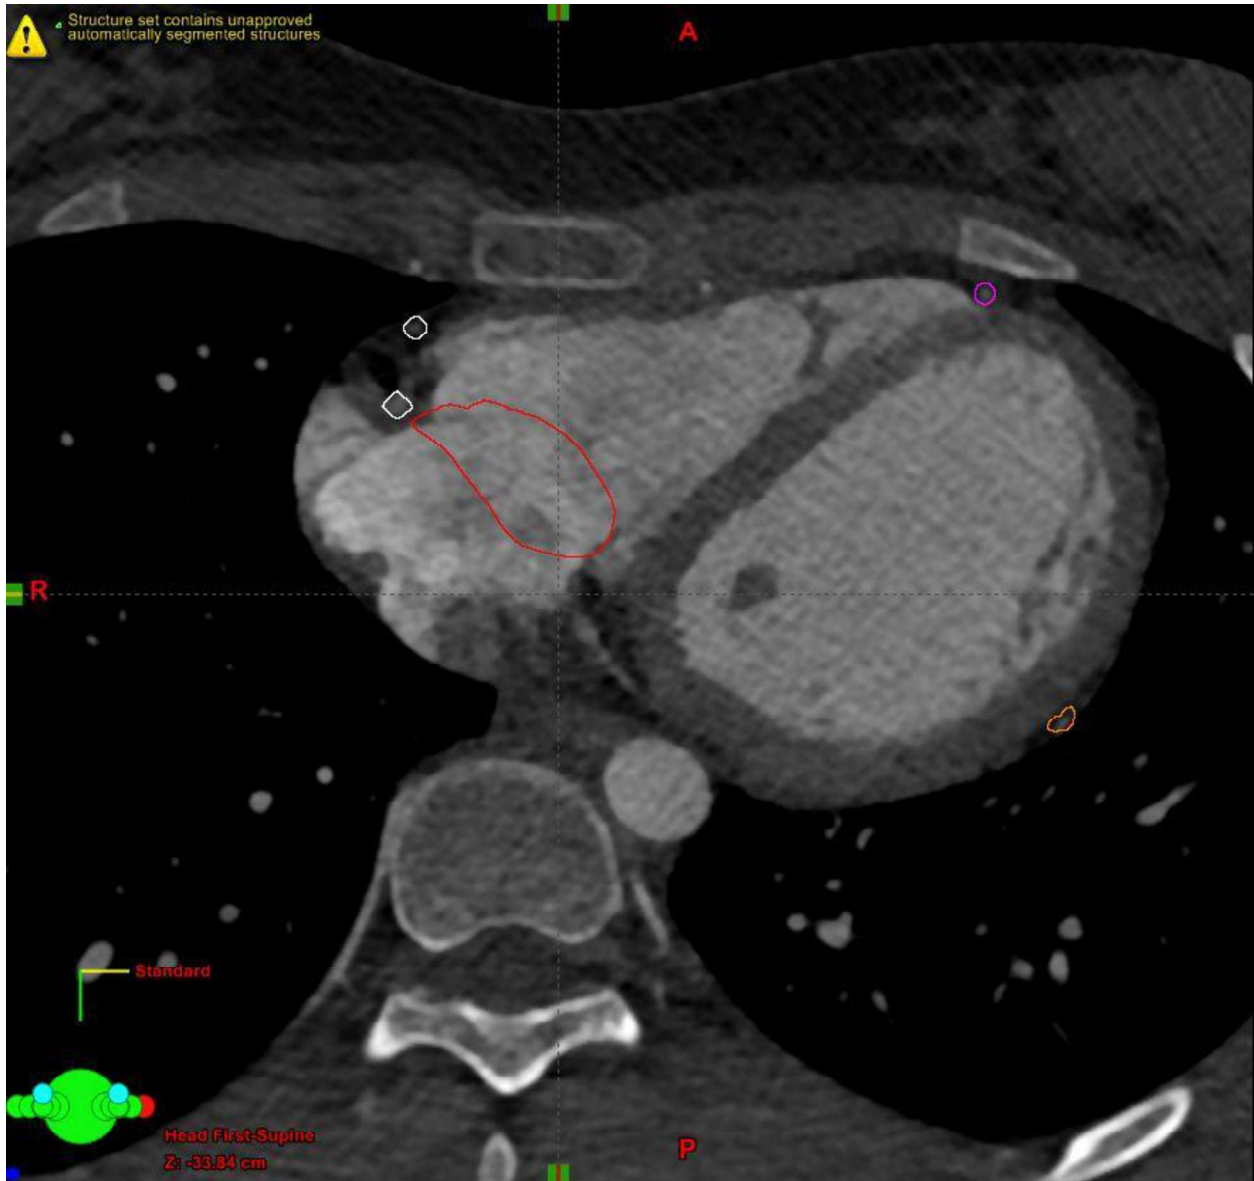

Yellow: Left main coronary artery

Pink: Left anterior descending

Orange: Left Circumflex

White: Right Coronary Artery

Brown: Aortic Valve

Light green: Pulmonary Valve

Blue: Mitral Valve

Red: Tricuspid Valve



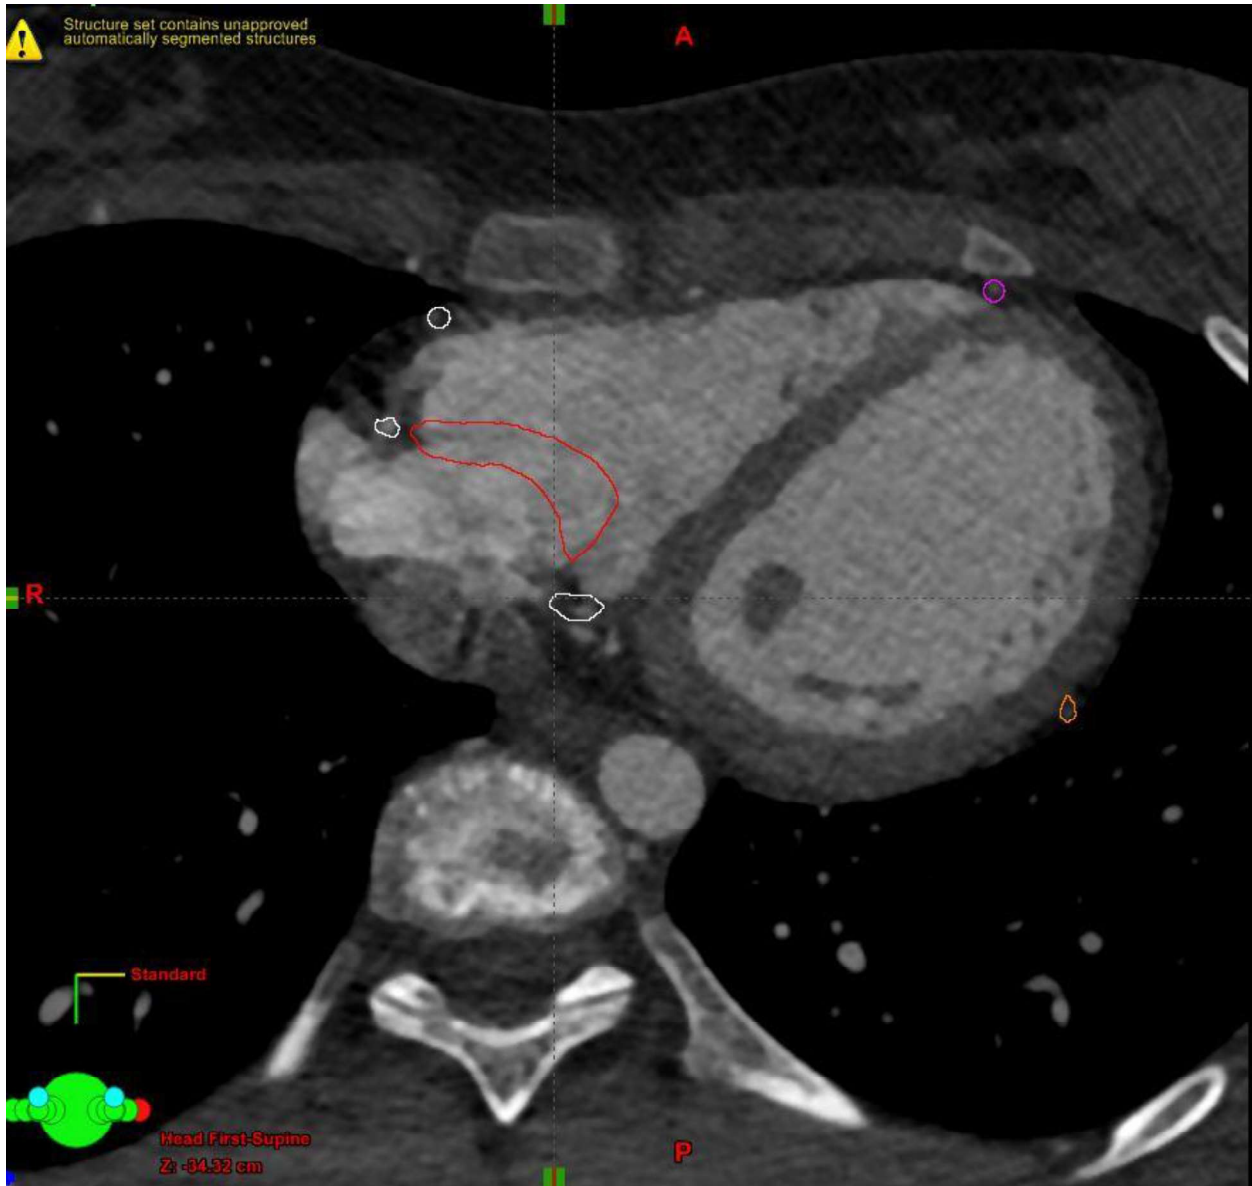

Yellow: Left main coronary artery

Pink: Left anterior descending

Orange: Left Circumflex

White: Right Coronary Artery

Brown: Aortic Valve

Light green: Pulmonary Valve

Blue: Mitral Valve

Red: Tricuspid Valve

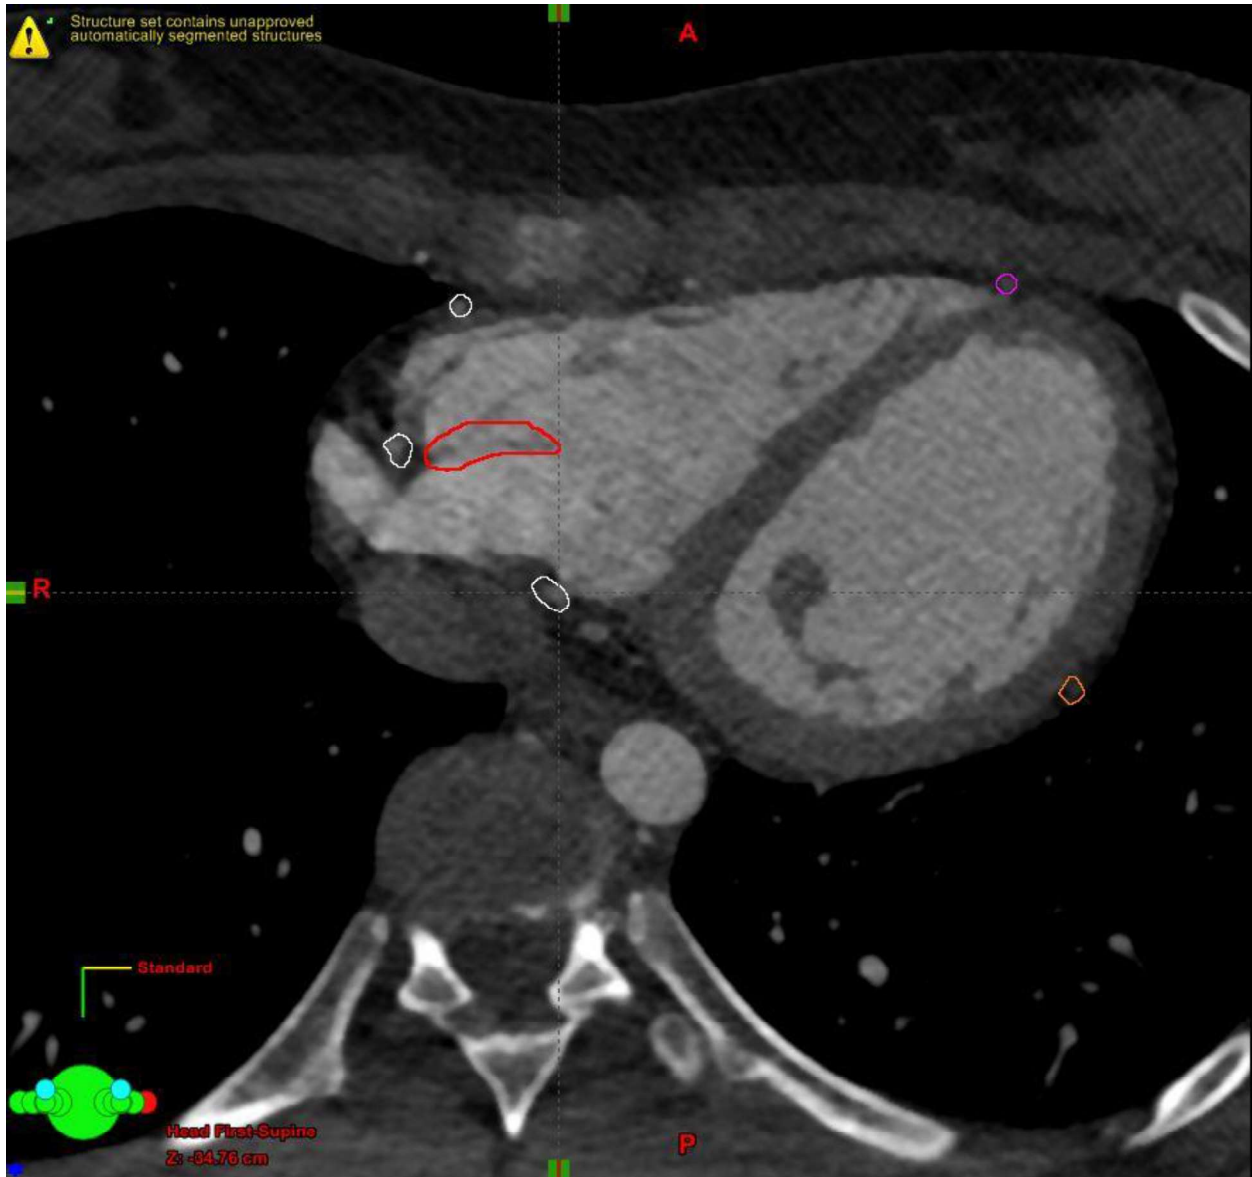

Yellow: Left main coronary artery

Pink: Left anterior descending

Orange: Left Circumflex

White: Right Coronary Artery

Brown: Aortic Valve

Light green: Pulmonary Valve

Blue: Mitral Valve

Red: Tricuspid Valve



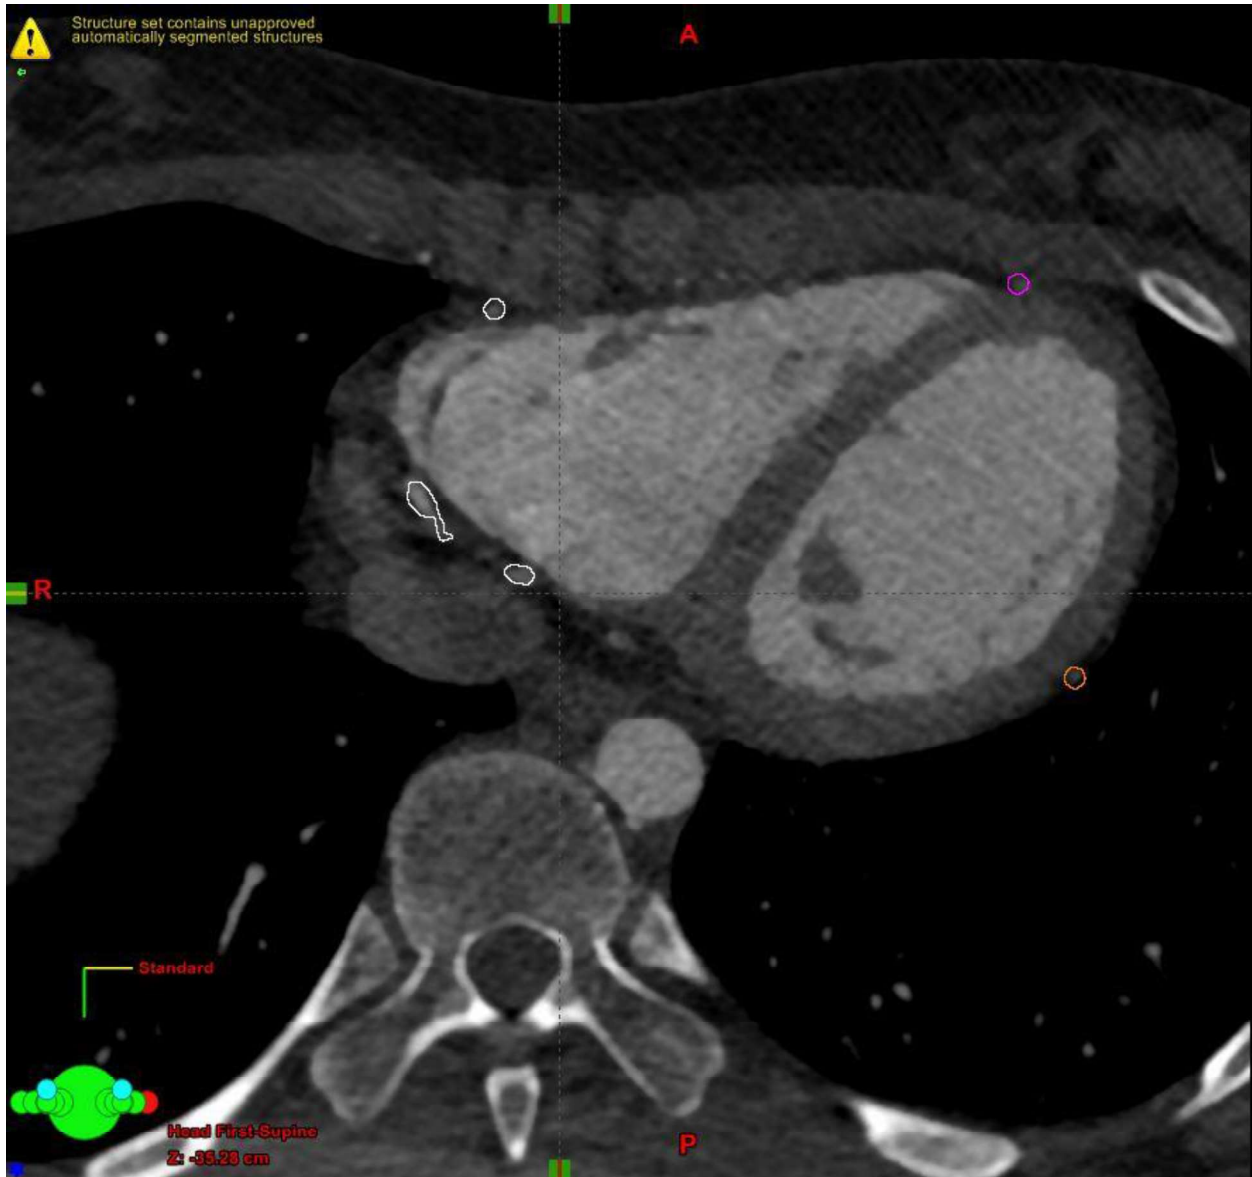

Yellow: Left main coronary artery

Pink: Left anterior descending

Orange: Left Circumflex

White: Right Coronary Artery

Brown: Aortic Valve

Light green: Pulmonary Valve

Blue: Mitral Valve

Red: Tricuspid Valve

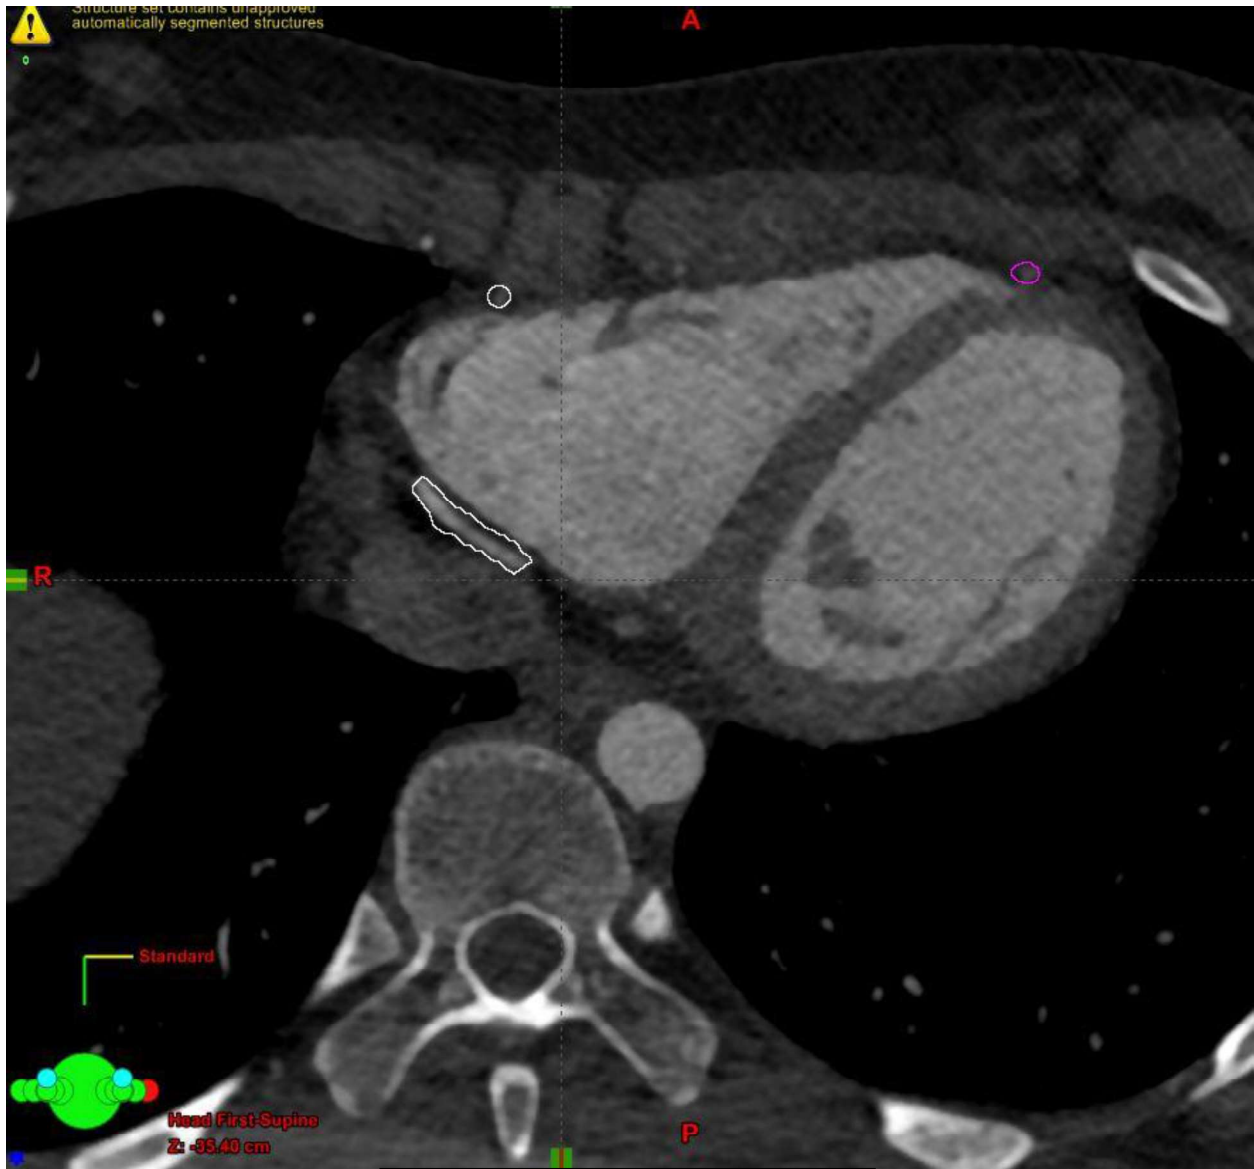

Yellow: Left main coronary artery

Pink: Left anterior descending

Orange: Left Circumflex

White: Right Coronary Artery

Brown: Aortic Valve

Light green: Pulmonary Valve

Blue: Mitral Valve

Red: Tricuspid Valve

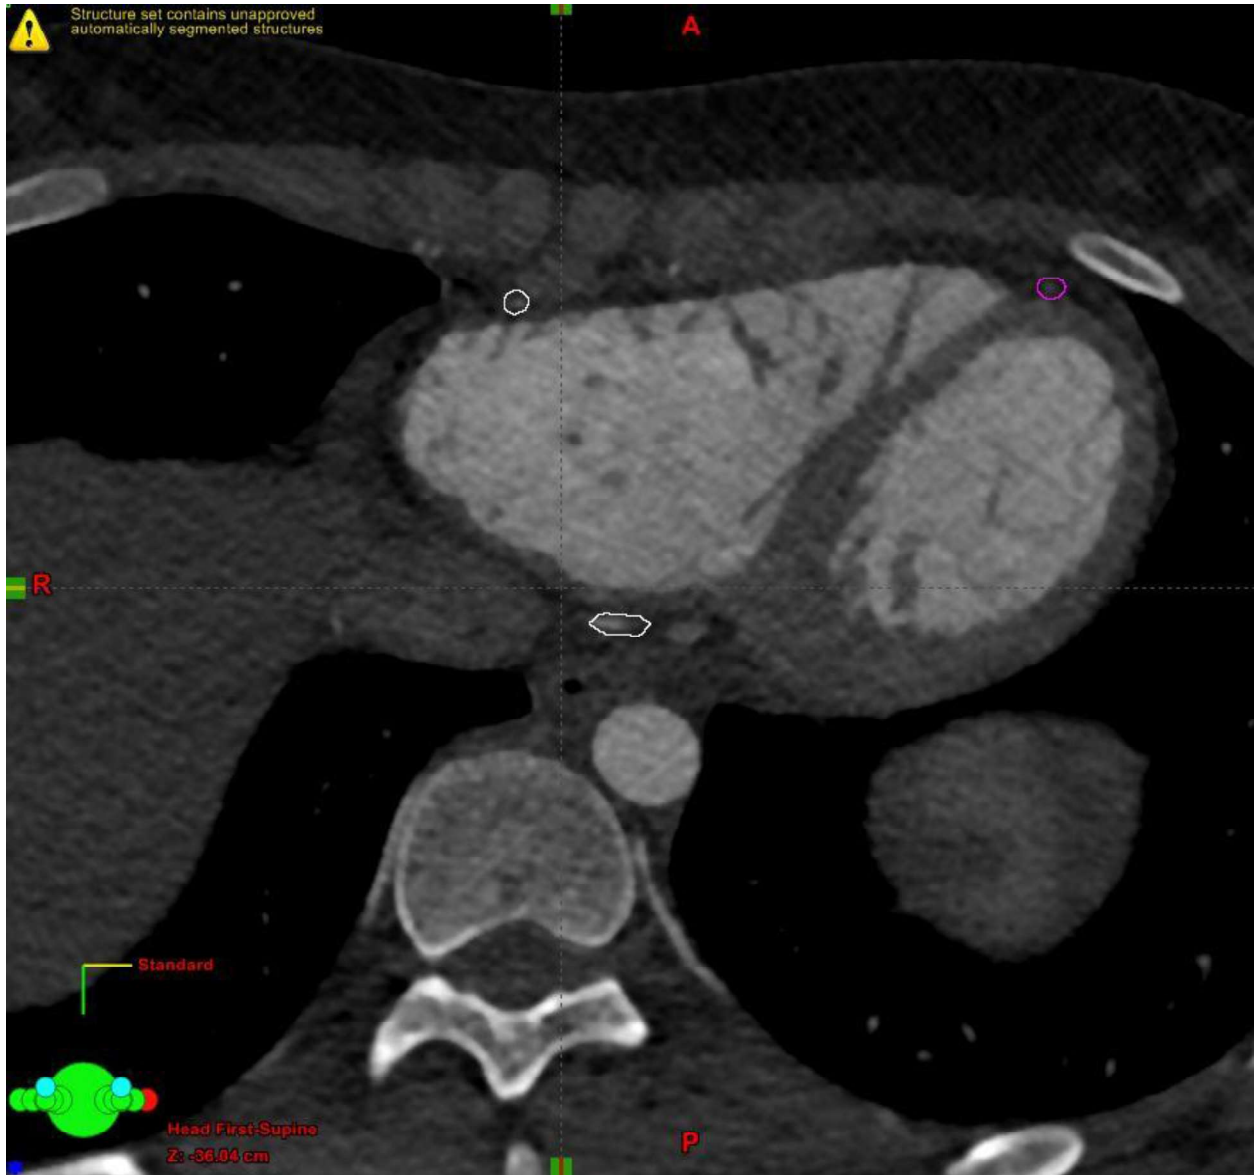

Yellow: Left main coronary artery

Pink: Left anterior descending

Orange: Left Circumflex

White: Right Coronary Artery

Brown: Aortic Valve

Light green: Pulmonary Valve

Blue: Mitral Valve

Red: Tricuspid Valve

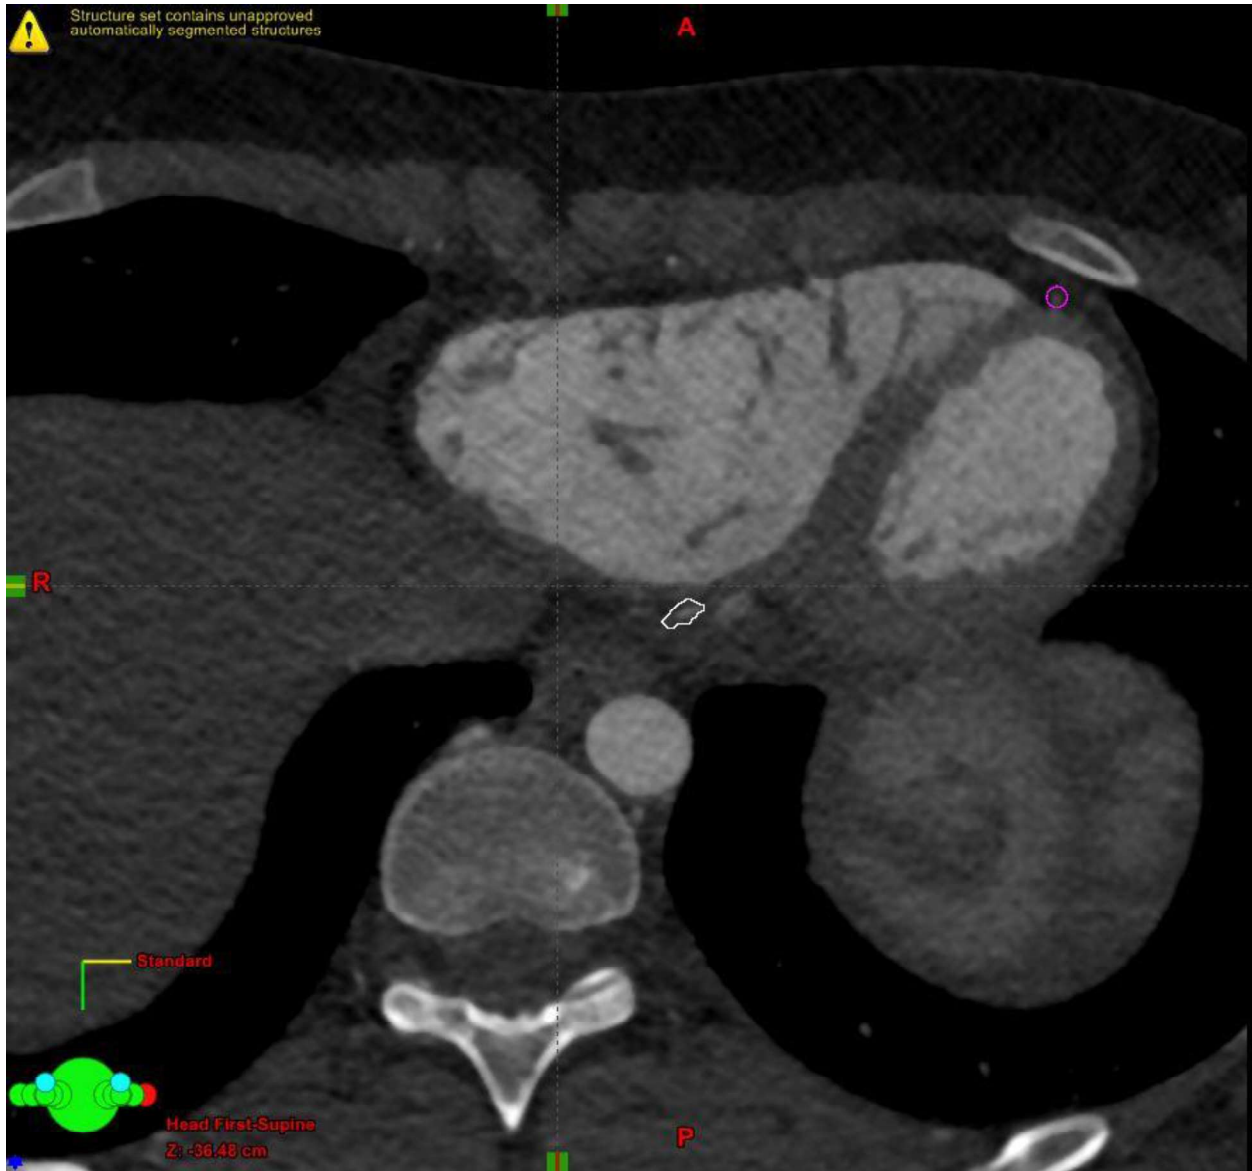

Yellow: Left main coronary artery

Pink: Left anterior descending

Orange: Left Circumflex

White: Right Coronary Artery

Brown: Aortic Valve

Light green: Pulmonary Valve

Blue: Mitral Valve

Red: Tricuspid Valve

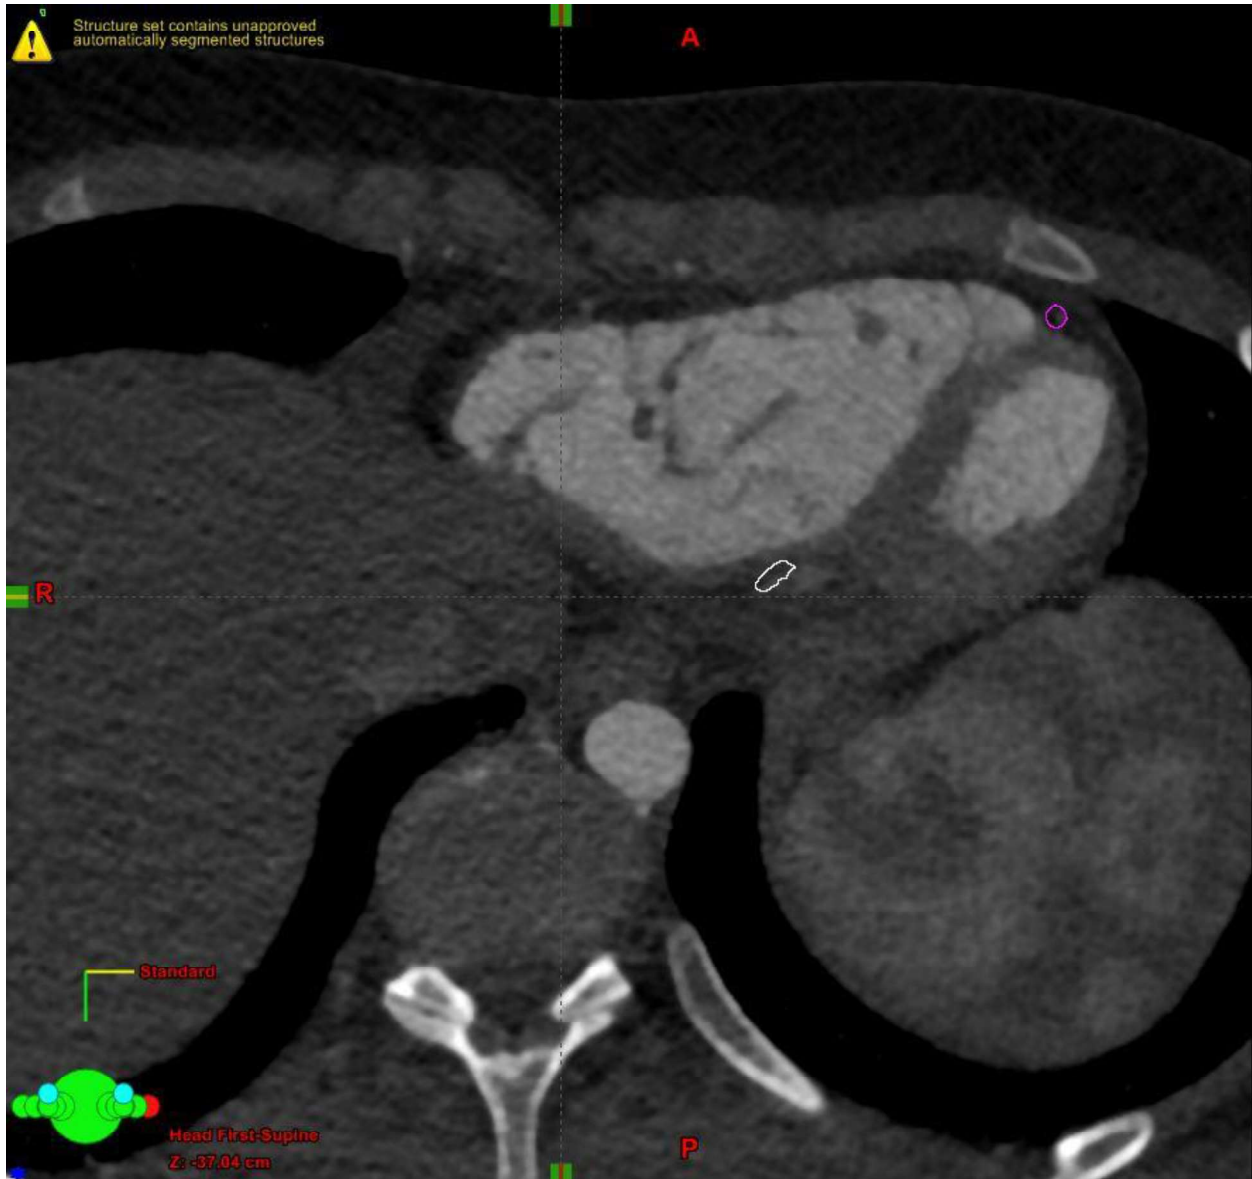

Yellow: Left main coronary artery

Pink: Left anterior descending

Orange: Left Circumflex

White: Right Coronary Artery

Brown: Aortic Valve

Light green: Pulmonary Valve

Blue: Mitral Valve

Red: Tricuspid Valve



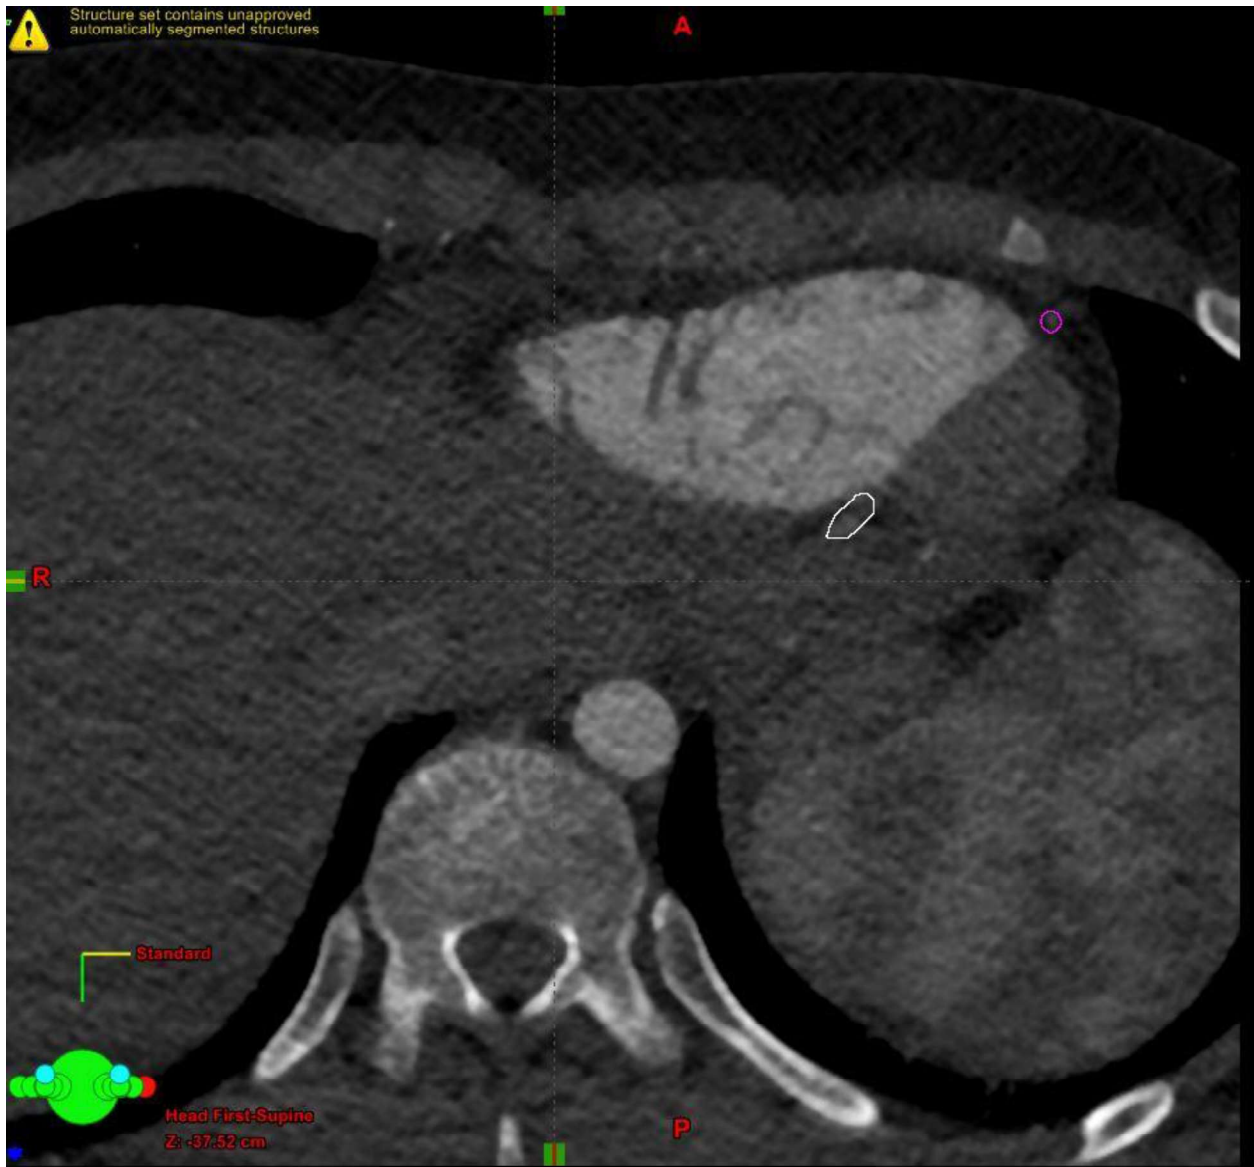

Yellow: Left main coronary artery

Pink: Left anterior descending

Orange: Left Circumflex

White: Right Coronary Artery

Brown: Aortic Valve

Light green: Pulmonary Valve

Blue: Mitral Valve

Red: Tricuspid Valve

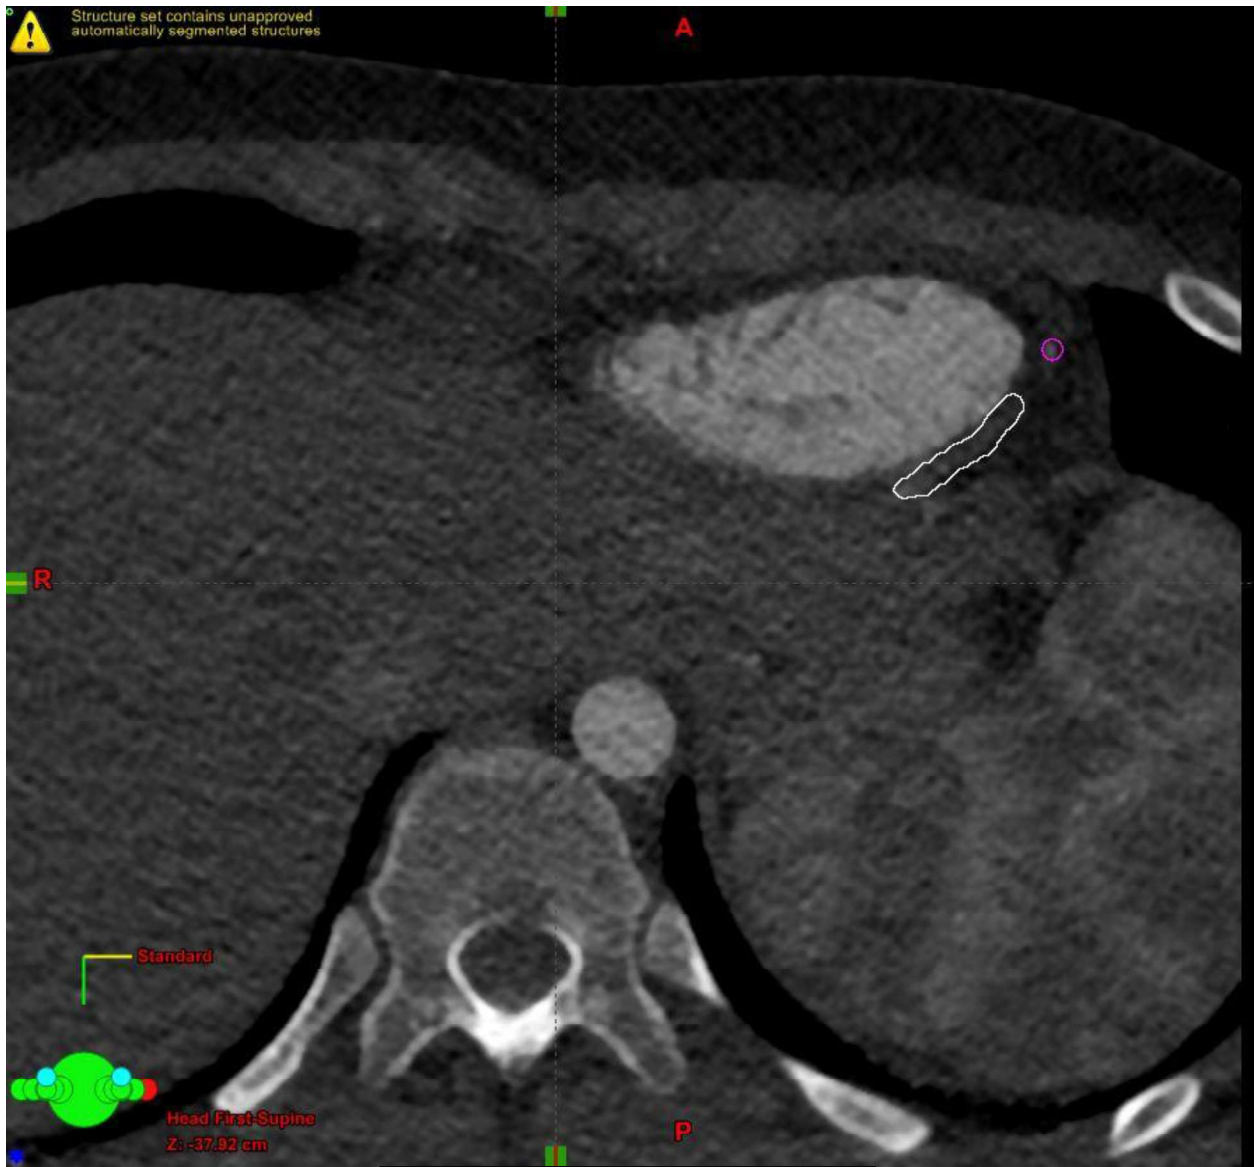

Yellow: Left main coronary artery

Pink: Left anterior descending

Orange: Left Circumflex

White: Right Coronary Artery

Brown: Aortic Valve

Light green: Pulmonary Valve

Blue: Mitral Valve

Red: Tricuspid Valve



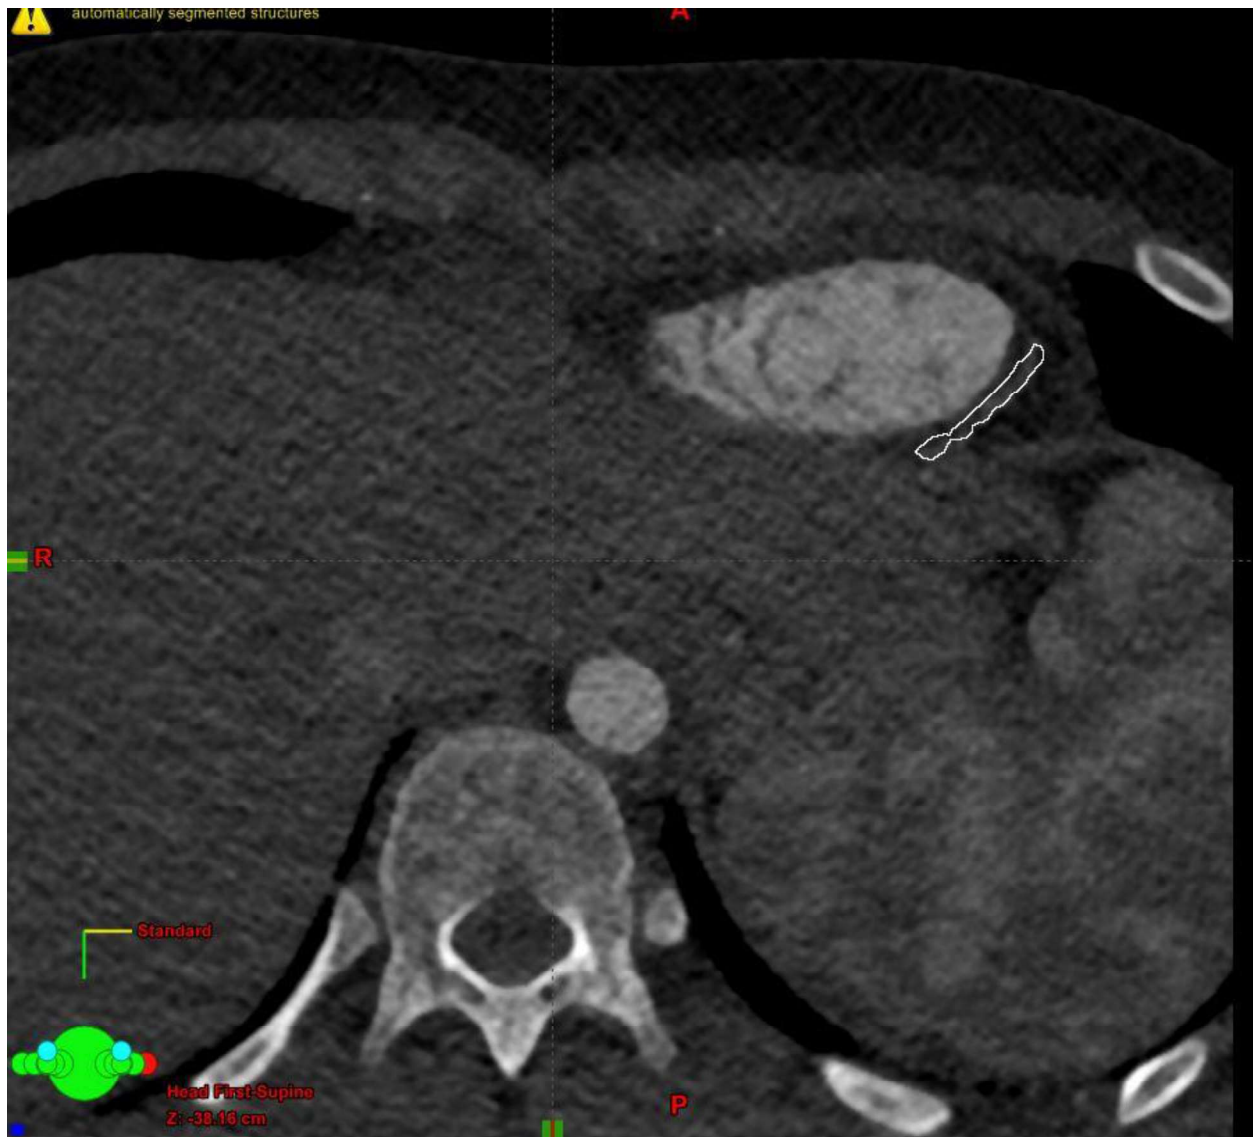

Yellow: Left main coronary artery

Pink: Left anterior descending

Orange: Left Circumflex

White: Right Coronary Artery

Brown: Aortic Valve

Light green: Pulmonary Valve

Blue: Mitral Valve

Red: Tricuspid Valve

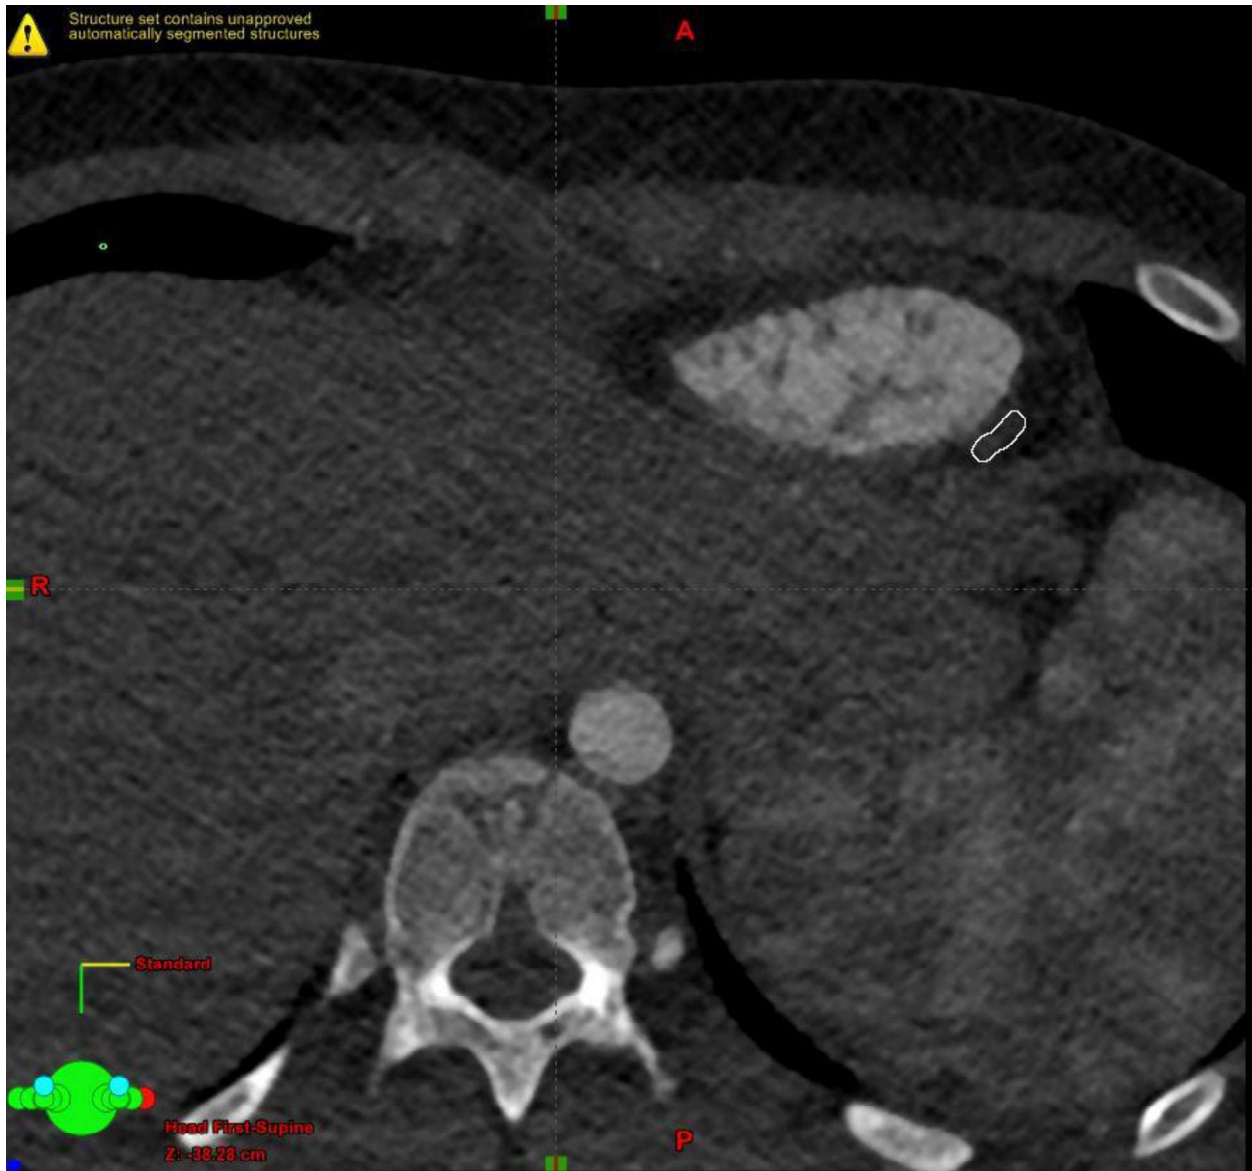

Yellow: Left main coronary artery

Pink: Left anterior descending

Orange: Left Circumflex

White: Right Coronary Artery

Brown: Aortic Valve

Light green: Pulmonary Valve

Blue: Mitral Valve

Red: Tricuspid Valve

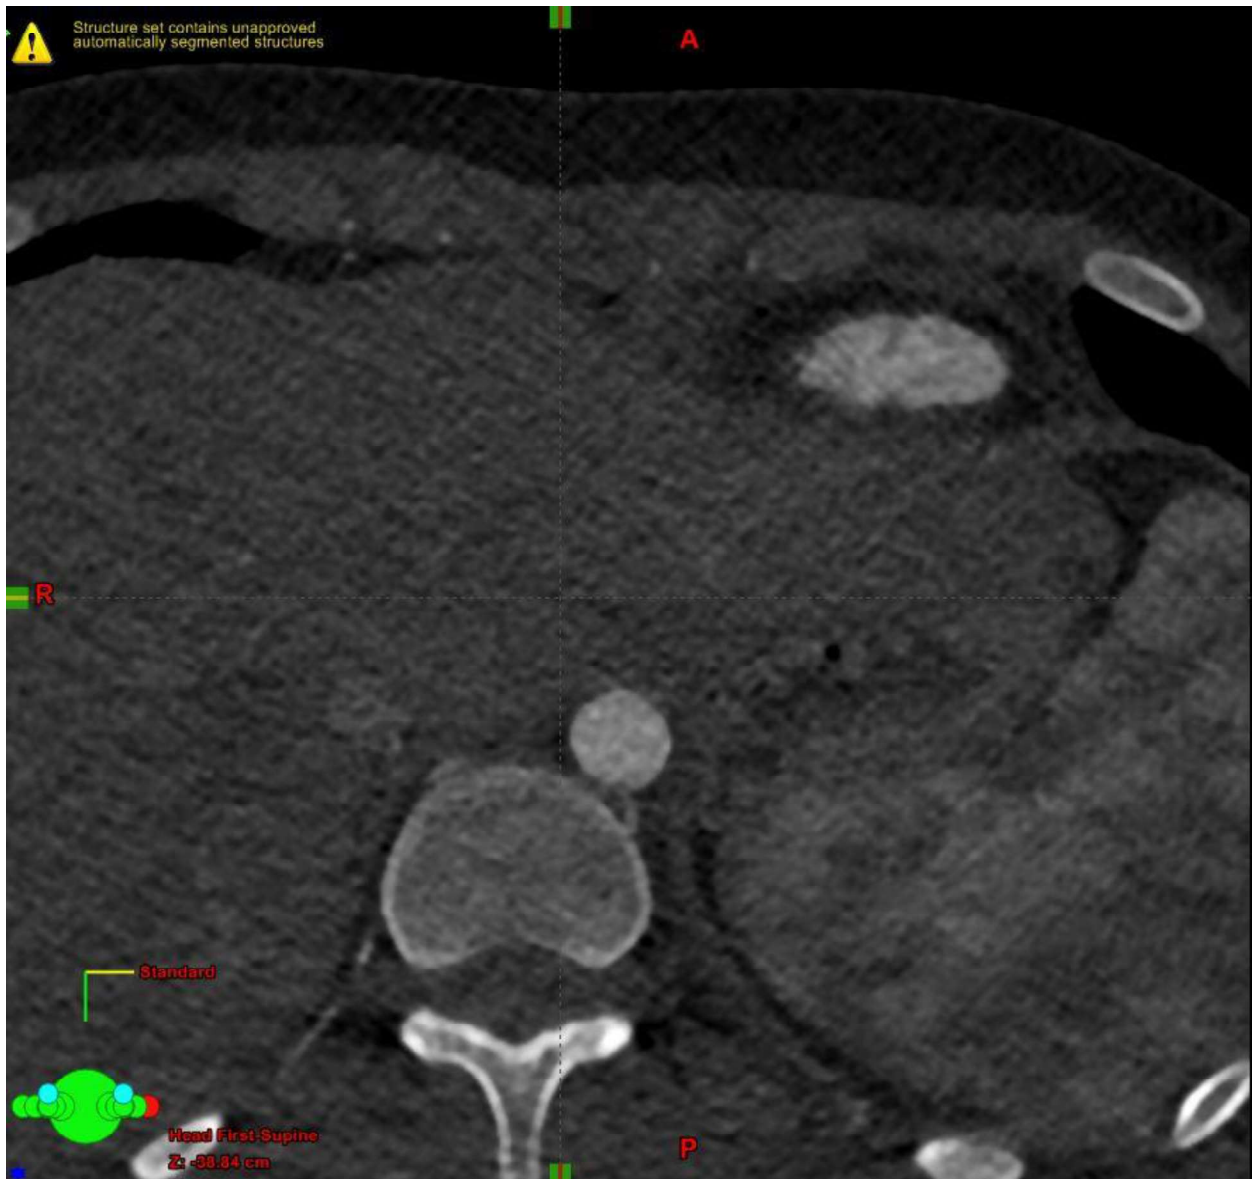

Yellow: Left main coronary artery

Pink: Left anterior descending

Orange: Left Circumflex

White: Right Coronary Artery

Brown: Aortic Valve

Light green: Pulmonary Valve

Blue: Mitral Valve

Red: Tricuspid Valve
